# Supplementary material for: 1-Butyl-3-methylimidazolium tetrafluoroborate as suitable solvent for BF3: the case of alkyne hydration. Chemistry vs electrochemistry
Source: publisher site journal article supplement (doi:10.3762/bjoc.19.147), 2023-12-28
Supplement: Additional file 1 [file 1860-5397-19-147-S1.pdf]

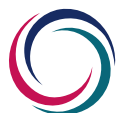

## Supporting Information

for

### **1-Butyl-3-methylimidazolium tetrafluoroborate as suitable solvent for BF<sub>3</sub>: the case of alkyne hydration. Chemistry vs electrochemistry**

Marta David, Elisa Galli, Richard C. D. Brown, Marta Feroci, Fabrizio Vetica and Martina Bortolami

*Beilstein J. Org. Chem.* **2023**, *19*, 1966–1981. [doi:10.3762/bjoc.19.147](https://doi.org/10.3762/bjoc.19.147)

## Additional experimental data

## Table of contents

|                                                                                                                                                                                                                                                                                                                                                                                                                                                                                                                                                        |     |
|--------------------------------------------------------------------------------------------------------------------------------------------------------------------------------------------------------------------------------------------------------------------------------------------------------------------------------------------------------------------------------------------------------------------------------------------------------------------------------------------------------------------------------------------------------|-----|
| Table S1. Hydration of different alkynes catalysed by $\text{BF}_3 \cdot \text{Et}_2\text{O}$ in $\text{BMIm-BF}_4$ .....                                                                                                                                                                                                                                                                                                                                                                                                                              | S2  |
| Table S2. Hydration of different alkynes catalysed by electrogenerated $\text{BF}_3$ in $\text{BMIm-BF}_4$ .....                                                                                                                                                                                                                                                                                                                                                                                                                                       | S4  |
| Figure S1. $^{19}\text{F}$ -NMR spectra under neat conditions of (a) $\text{BMIm-BF}_4$ , (b) $\text{BF}_3 \cdot \text{Et}_2\text{O}$ in $\text{BMIm-BF}_4$ , (c) $\text{BF}_3 \cdot \text{Et}_2\text{O}$ and $\text{H}_2\text{O}$ in $\text{BMIm-BF}_4$ , (d) anodically oxidated $\text{BMIm-BF}_4$ in a undivided cell, (e) anodically oxidated $\text{BMIm-BF}_4$ in a divided cell, (f) recycled $\text{BMIm-BF}_4$ after anodical oxidation in a divided cell, reaction with diphenylacetylene, ethereal extraction and solvent evaporation..... | S6  |
| Figure S2. $^{13}\text{C}$ NMR spectra under neat conditions of (a) $\text{BMIm-BF}_4$ , (b) DIPEA (0.6 mmol) added to anodically oxidated $\text{BMIm-BF}_4$ (60 C) in a divided cell.....                                                                                                                                                                                                                                                                                                                                                            | S7  |
| Figure S3. $^{19}\text{F}$ NMR spectra under neat conditions of (a) DBU and $\text{BF}_3 \cdot \text{Et}_2\text{O}$ in $\text{BMIm-BF}_4$ , (b) DBU (0.6 mmol) added to anodically oxidated $\text{BMIm-BF}_4$ (60 C) in a divided cell.....                                                                                                                                                                                                                                                                                                           | S8  |
| Figure S4. $^{19}\text{F}$ NMR spectra under neat conditions of DBU and $\text{BF}_3 \cdot \text{Et}_2\text{O}$ in $\text{BMIm-BF}_4$ .....                                                                                                                                                                                                                                                                                                                                                                                                            | S9  |
| Figure S5. $^{13}\text{C}$ NMR spectra under neat conditions of (a) $\text{BMIm-BF}_4$ , (b) DBU in $\text{BMIm-BF}_4$ , (c) $\text{BF}_3 \cdot \text{Et}_2\text{O}$ and DBU in $\text{BMIm-BF}_4$ , (d) DBU (0.6 mmol) in anodically oxidated $\text{BMIm-BF}_4$ (60 C) in a divided cell, (e) DBU (1.2 mmol) in anodically oxidated $\text{BMIm-BF}_4$ (60 C) in a divided cell.....                                                                                                                                                                 | S10 |
| Analytical data.....                                                                                                                                                                                                                                                                                                                                                                                                                                                                                                                                   | S11 |
| $^1\text{H}$ and $^{13}\text{C}\{^1\text{H}\}$ NMR spectra in $\text{CDCl}_3$ .....                                                                                                                                                                                                                                                                                                                                                                                                                                                                    | S19 |
| References.....                                                                                                                                                                                                                                                                                                                                                                                                                                                                                                                                        | S40 |

**Table S1.** Hydration of different alkynes catalysed by  $\text{BF}_3 \cdot \text{Et}_2\text{O}$  in  $\text{BMIm-BF}_4$ . <sup>a</sup>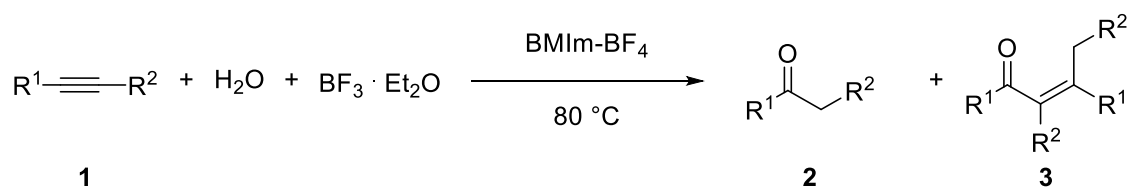

| Entry           | Alkyne    | $\text{BF}_3 \cdot \text{Et}_2\text{O}$ <sup>b</sup> | Time | <b>2</b> , yield <sup>c</sup>       | <b>3</b> , yield <sup>c</sup> | Recovered <b>1</b> <sup>c</sup> |
|-----------------|-----------|------------------------------------------------------|------|-------------------------------------|-------------------------------|---------------------------------|
| 1 <sup>d</sup>  | <b>1a</b> | 3                                                    | 18 h | <b>2a</b> , 81%                     | -                             | 11%                             |
| 2               | <b>1b</b> | 3                                                    | 5 h  | <b>2b</b> , 97%                     | -                             | -                               |
| 3               | <b>1b</b> | 3                                                    | 18 h | <b>2b</b> , 100%                    | -                             | -                               |
| 4               | <b>1c</b> | 3                                                    | 5 h  | <b>2c</b> , 76%                     | -                             | -                               |
| 5               | <b>1d</b> | 3                                                    | 5 h  | <b>2d</b> , 32%                     | <b>3d</b> , 58%               | -                               |
| 6               | <b>1d</b> | 1                                                    | 1 h  | <b>2d</b> , 81%                     | -                             | -                               |
| 7               | <b>1e</b> | 3                                                    | 5 h  | -                                   | <b>3e</b> , 70%               | -                               |
| 8               | <b>1e</b> | 3                                                    | 18 h | -                                   | <b>3e</b> , 36%               | -                               |
| 9               | <b>1e</b> | 2                                                    | 5 h  | <b>2e</b> , 21%                     | <b>3e</b> , 74%               | -                               |
| 10              | <b>1e</b> | 1                                                    | 1 h  | <b>2e</b> , 61%                     | <b>3e</b> , 38%               | -                               |
| 11              | <b>1e</b> | 0.5                                                  | 1 h  | <b>2e</b> , 49%                     | <b>3e</b> , 31%               | -                               |
| 12              | <b>1f</b> | 1                                                    | 1 h  | <b>2f</b> , 43%                     | <b>3f</b> , 56%               | -                               |
| 13              | <b>1f</b> | 0.5                                                  | 1 h  | <b>2f</b> , 26%                     | -                             | 37%                             |
| 14              | <b>1g</b> | 1                                                    | 1 h  | <b>2g</b> , 81%                     | <b>3g</b> , 4%                | -                               |
| 15              | <b>1h</b> | 1                                                    | 1 h  | <b>2h</b> , 47%                     | <b>3h</b> , 43%               | -                               |
| 16              | <b>1i</b> | 1                                                    | 1 h  | <b>2i</b> , 72%                     | -                             | 21%                             |
| 17              | <b>1i</b> | 1                                                    | 2 h  | <b>2i</b> , 64%                     | <b>3i</b> , 29%               | 6%                              |
| 18 <sup>e</sup> | <b>1j</b> | 5 <sup>f</sup>                                       | 5 h  | <b>2j</b> , 21%<br><b>2jj</b> , 14% | -                             | 5%                              |

|                 |           |                |      |                                     |   |     |
|-----------------|-----------|----------------|------|-------------------------------------|---|-----|
| 19 <sup>e</sup> | <b>1j</b> | 5 <sup>f</sup> | 18 h | <b>2j</b> , 13%<br><b>2jj</b> , 14% | - | -   |
| 20 <sup>e</sup> | <b>1j</b> | 3 <sup>f</sup> | 1 h  | <b>2j</b> , 57%<br><b>2jj</b> , 16% | - | 18% |
| 21 <sup>e</sup> | <b>1j</b> | 3 <sup>f</sup> | 5 h  | <b>2j</b> , 16%<br><b>2jj</b> , 29% | - | 2%  |
| 22 <sup>e</sup> | <b>1j</b> | 2 <sup>f</sup> | 1 h  | <b>2j</b> , 56%<br><b>2jj</b> , 22% | - | 6%  |
| 23              | <b>1k</b> | 3              | 18 h | <b>2k</b> , 79%                     | - | -   |
| 25              | <b>1l</b> | 2              | 1 h  | <b>2l</b> , 13%                     | - | 63% |
| 26              | <b>1l</b> | 2              | 18 h | <b>2l</b> , 62%                     | - | -   |
| 27              | <b>1m</b> | 5              | 18 h | <b>2m</b> , 65%                     | - | 25% |
| 28              | <b>1m</b> | 3              | 5 h  | <b>2m</b> , 26%                     | - | 73% |
| 29              | <b>1n</b> | 5              | 18 h | <b>2n</b> , 47%                     | - | 48% |
| 30              | <b>1n</b> | 3              | 18 h | <b>2n</b> , 23%                     | - | 68% |

<sup>a</sup> All the reactions were carried out at 80 °C in BMIm-BF<sub>4</sub>, kept under vacuum for 16 h before each use, with 0.3 mmol of alkyne **1** and 0.3 mmol of H<sub>2</sub>O. <sup>b</sup> Equivalents with respect to **1**. <sup>c</sup> Yields calculated from <sup>1</sup>H NMR spectra of the crude extracts. <sup>d</sup> Replicate of experiment reported in entry 9 of Table 1, for comparison. <sup>e</sup> 0.6 mmol of H<sub>2</sub>O were used. <sup>f</sup> Equivalents with respect to one alkyne group of **1j**.

**Table S2.** Hydration of different alkynes catalysed by electrogenerated  $\text{BF}_3$  in  $\text{BMIm-BF}_4$ . <sup>a</sup>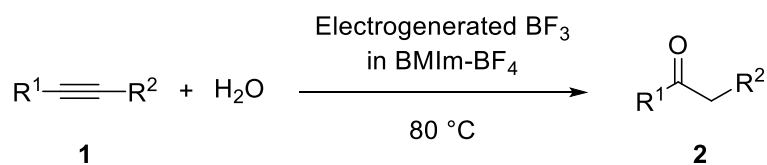

| Entry           | Alkyne    | Electrogenerated $\text{BF}_3$ (F/mol) <sup>b</sup> | Time | <b>2</b> , yield <sup>c</sup>       | Recovered <b>1</b> <sup>c</sup> |
|-----------------|-----------|-----------------------------------------------------|------|-------------------------------------|---------------------------------|
| 1               | <b>1a</b> | 4                                                   | 18 h | <b>2a</b> , 85%                     | 3%                              |
| 2               | <b>1b</b> | 4                                                   | 5 h  | <b>2b</b> , 84%                     | -                               |
| 3               | <b>1c</b> | 4                                                   | 5 h  | <b>2c</b> , 94%                     | -                               |
| 4               | <b>1d</b> | 1                                                   | 1 h  | <b>2d</b> , 78%                     | -                               |
| 5               | <b>1e</b> | 1                                                   | 1 h  | <b>2e</b> , 84% <sup>d</sup>        | -                               |
| 6               | <b>1f</b> | 1                                                   | 1 h  | <b>2f</b> , 91%                     | -                               |
| 7               | <b>1g</b> | 1                                                   | 1 h  | <b>2g</b> , 78%                     | -                               |
| 8               | <b>1h</b> | 1                                                   | 1 h  | <b>2h</b> , 94%                     | -                               |
| 9               | <b>1i</b> | 1                                                   | 1 h  | <b>2i</b> , 20%                     | 61%                             |
| 10              | <b>1i</b> | 1                                                   | 18 h | <b>2i</b> , 40%                     | 12%                             |
| 11              | <b>1i</b> | 2                                                   | 18 h | <b>2i</b> , 79%                     | -                               |
| 12 <sup>e</sup> | <b>1j</b> | 2                                                   | 1 h  | <b>2j</b> , 39%                     | 46%                             |
| 13 <sup>e</sup> | <b>1j</b> | 4                                                   | 5 h  | <b>2j</b> , 35%<br><b>2jj</b> , 53% | 3%                              |
| 14              | <b>1k</b> | 1                                                   | 5 h  | -                                   | 54%                             |
| 15              | <b>1k</b> | 2                                                   | 5 h  | <b>2k</b> , 13%                     | 73%                             |
| 16              | <b>1k</b> | 2                                                   | 18 h | <b>2k</b> , 51%                     | -                               |
| 17              | <b>1k</b> | 4                                                   | 18 h | <b>2k</b> , 45%                     | -                               |
| 18              | <b>1l</b> | 1                                                   | 1 h  | -                                   | 68%                             |

|    |           |                |      |                 |      |
|----|-----------|----------------|------|-----------------|------|
| 19 | <b>1l</b> | 2              | 18 h | <b>2l</b> , 11% | 43%  |
| 20 | <b>1l</b> | 4              | 18 h | <b>2l</b> , 23% | 33%  |
| 21 | <b>1m</b> | 4              | 18 h | -               | 100% |
| 22 | <b>1m</b> | 4 <sup>f</sup> | 18 h | <b>2m</b> , 58% | 40%  |
| 23 | <b>1n</b> | 4              | 18 h | -               | 100% |
| 24 | <b>1n</b> | 8              | 18 h | <b>2n</b> , 2%  | 78%  |
| 25 | <b>1n</b> | 4 <sup>f</sup> | 18 h | -               | 100% |

<sup>a</sup> BMIm-BF<sub>4</sub>, kept under vacuum for 16 h before each use, was electrolyzed (galvanostatic conditions: 10 mA·cm<sup>-2</sup>) on platinum electrodes (rt, N<sub>2</sub>) in divided cell configuration. At the end of electrolysis, alkyne **1** (0.3 mmol) and H<sub>2</sub>O (0.3 mmol) were added to the anolyte. All the reactions were carried out at 80 °C for the time reported in table. <sup>b</sup> Amount of electrogenerated BF<sub>3</sub> with respect to starting alkyne, admitting a 100% current efficiency (1 mF = 96.5 C = 1 mmol of BF<sub>3</sub>). <sup>c</sup> Yields calculated from <sup>1</sup>H NMR spectra of the crude extracts. <sup>d</sup> **3e**, 9%. <sup>e</sup> 0.6 mmol of H<sub>2</sub>O were used. <sup>f</sup> The electrolysis was carried out in the presence of the alkyne (0.3 mmol) in the anodic compartment. At the end of electrolysis, H<sub>2</sub>O (0.3 mmol) was added to the anolyte, then the reaction was carried out at 80 °C for the time reported in the table.

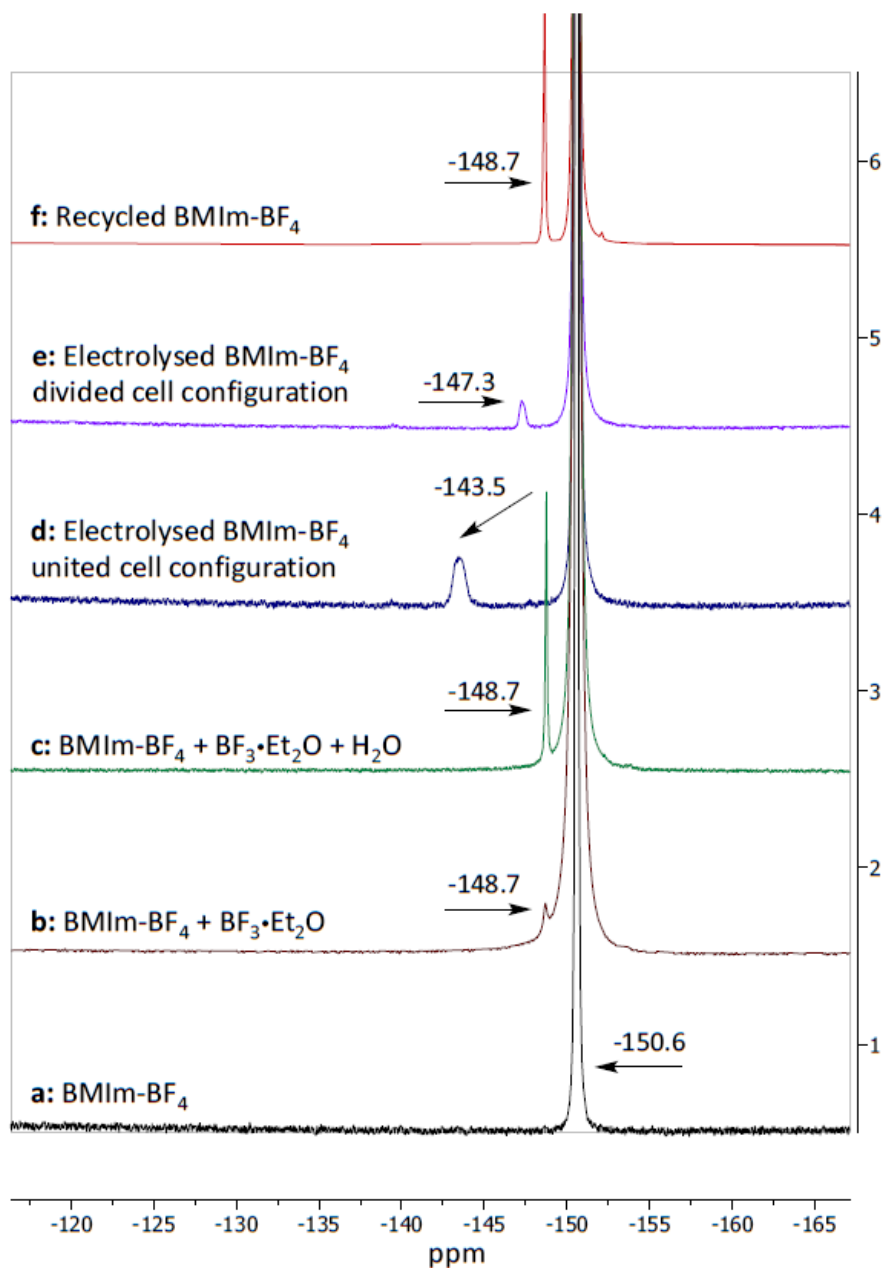

**Figure S1.**  $^{19}\text{F}$  NMR spectra under neat conditions of (a) BMIm- $\text{BF}_4$ , (b)  $\text{BF}_3 \cdot \text{Et}_2\text{O}$  in BMIm- $\text{BF}_4$ , (c)  $\text{BF}_3 \cdot \text{Et}_2\text{O}$  and  $\text{H}_2\text{O}$  in BMIm- $\text{BF}_4$ , (d) anodically oxidated BMIm- $\text{BF}_4$  in a undivided cell, (e) anodically oxidated BMIm- $\text{BF}_4$  in a divided cell, (f) recycled BMIm- $\text{BF}_4$  after anodical oxidation in a divided cell, reaction with diphenylacetylene, etheral extraction and solvent evaporation.

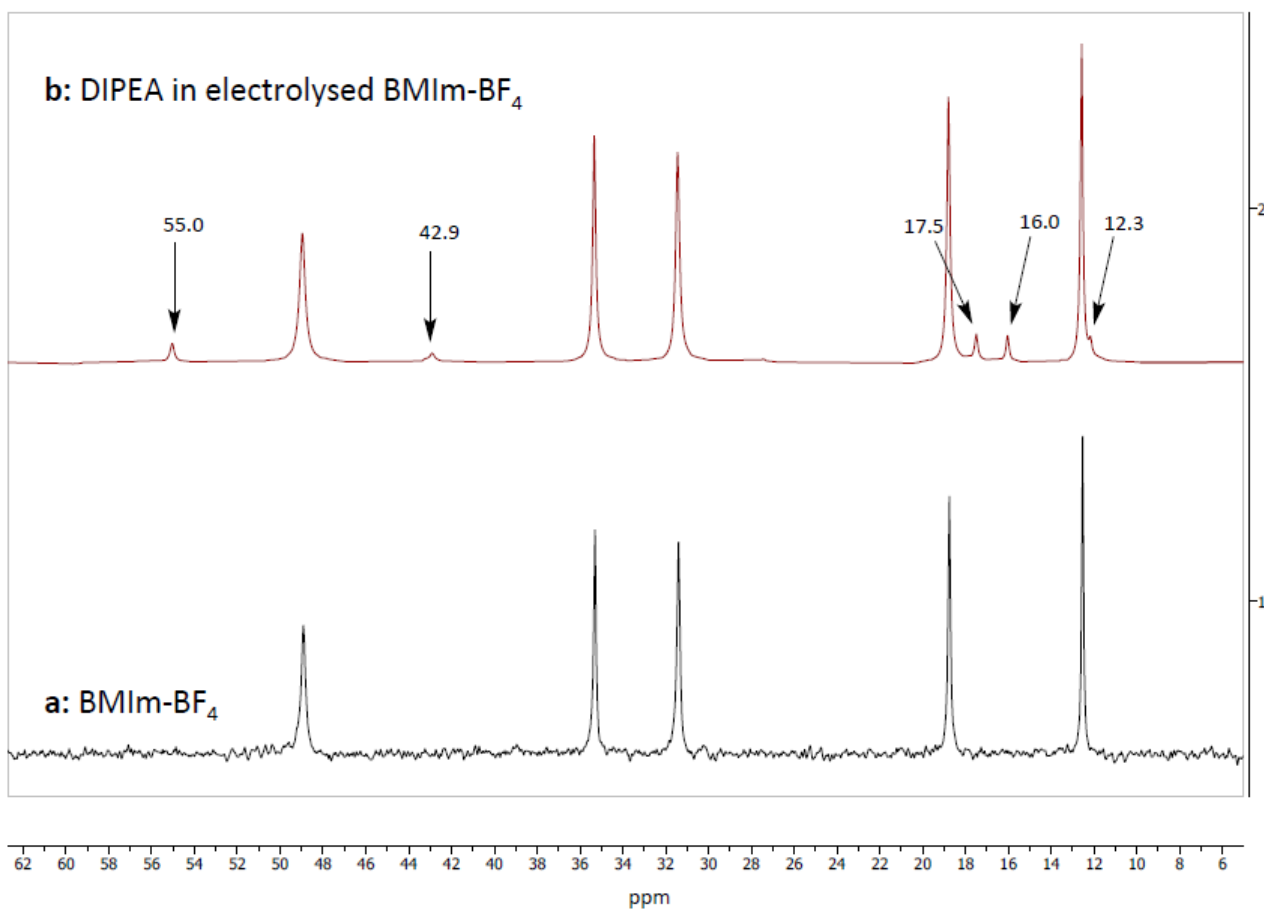

**Figure S2.**  $^{13}\text{C}$  NMR spectra under neat conditions of (a) BMIm-BF<sub>4</sub>, (b) DIPEA (0.6 mmol) added to anodically oxidated BMIm-BF<sub>4</sub> (60 C) in a divided cell.



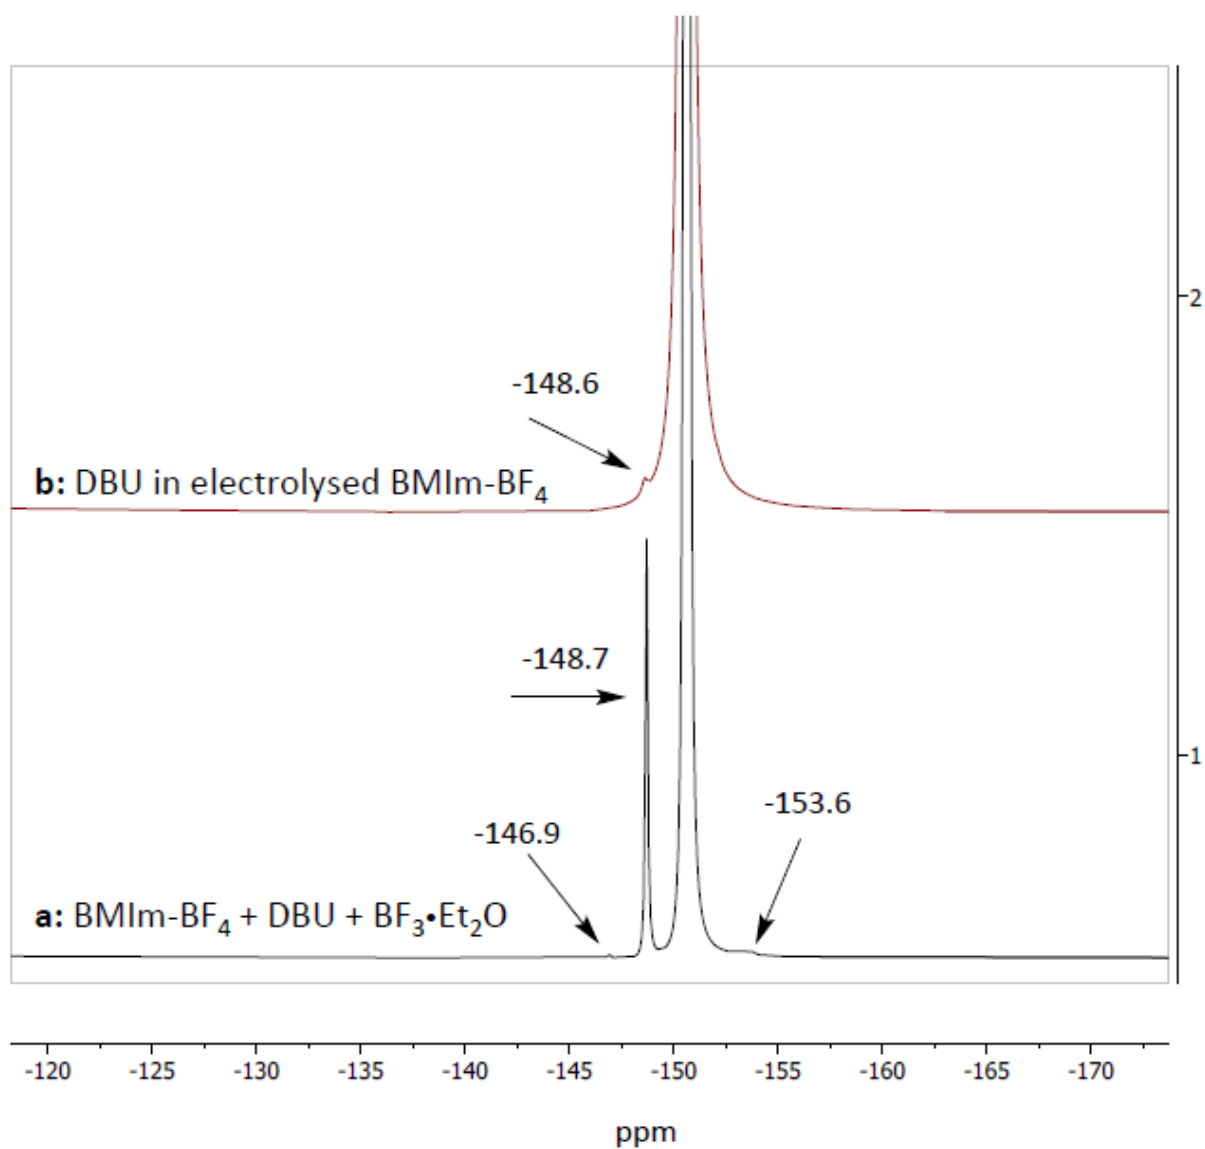

**Figure S3.**  $^{19}\text{F}$  NMR spectra under neat conditions of (a) DBU and  $\text{BF}_3\cdot\text{Et}_2\text{O}$  in BMIm- $\text{BF}_4$ , (b) DBU (0.6 mmol) added to anodically oxidated BMIm- $\text{BF}_4$  (60 C) in a divided cell.

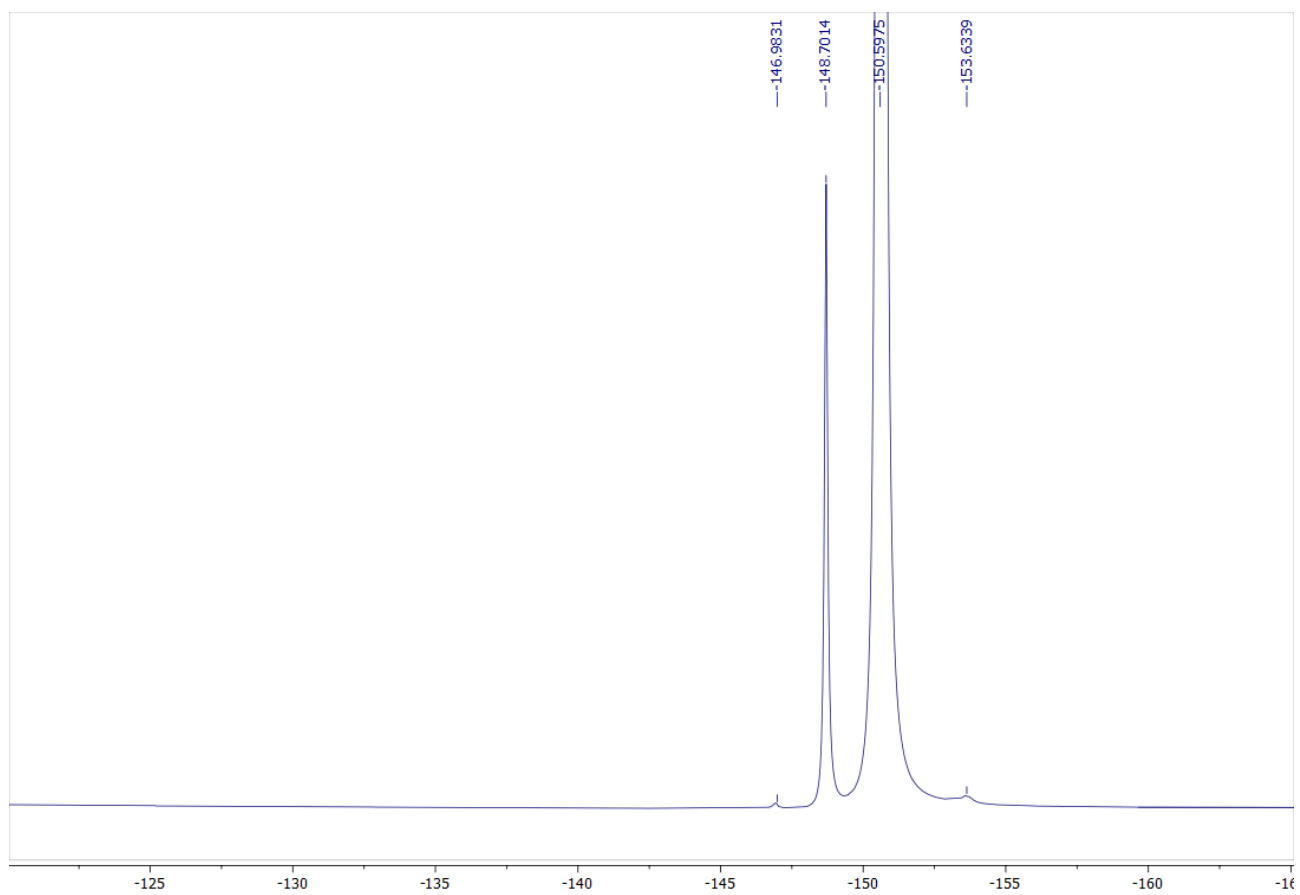

**Figure S4.**  $^{19}\text{F}$  NMR spectra under neat conditions of DBU and  $\text{BF}_3 \cdot \text{Et}_2\text{O}$  in BMIm- $\text{BF}_4$ .

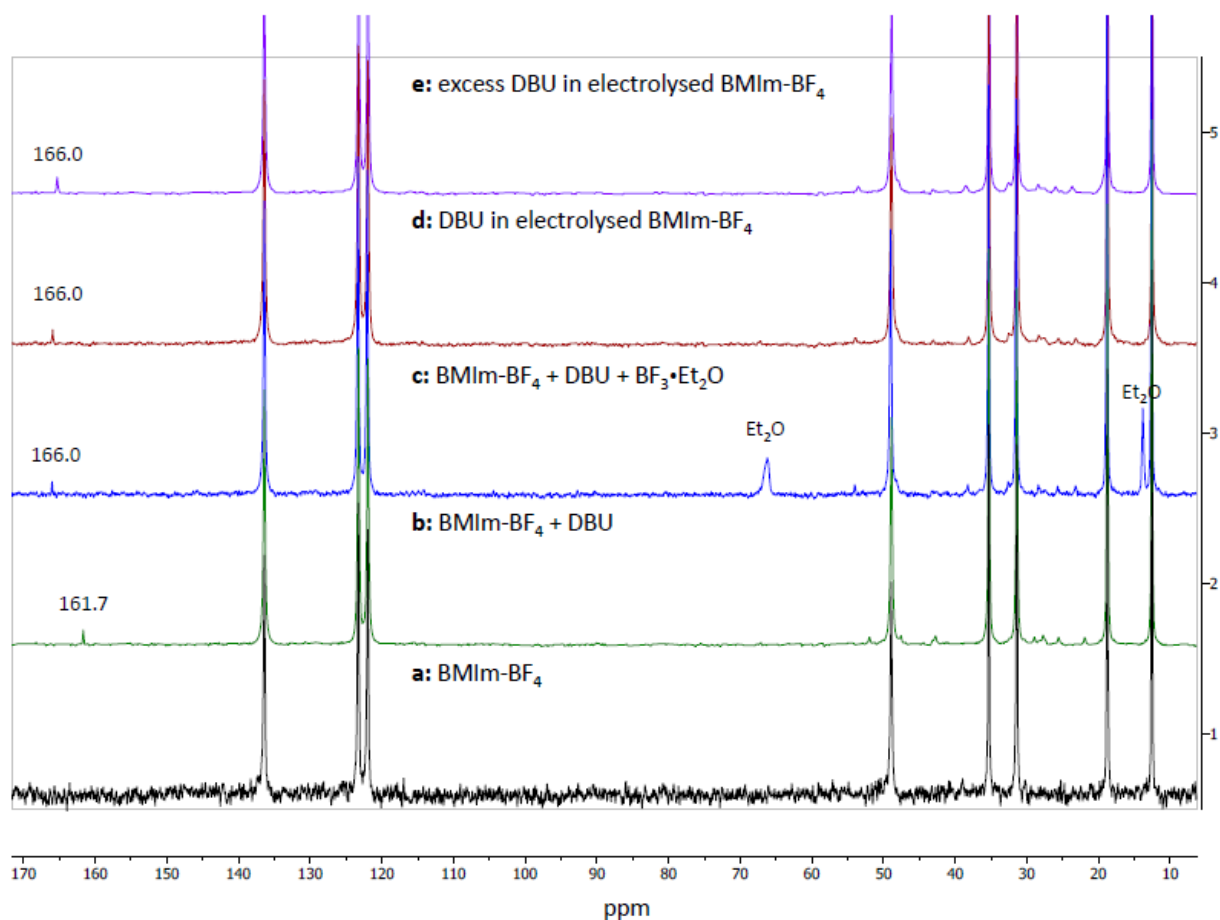

**Figure S5.**  $^{13}\text{C}$  NMR spectra under neat conditions of (a) BMIm-BF<sub>4</sub>, (b) DBU in BMIm-BF<sub>4</sub>, (c) BF<sub>3</sub>·Et<sub>2</sub>O and DBU in BMIm-BF<sub>4</sub>, (d) DBU (0.6 mmol) in anodically oxidated BMIm-BF<sub>4</sub> (60 C) in a divided cell, (e) DBU (1.2 mmol) in anodically oxidated BMIm-BF<sub>4</sub> (60 C) in a divided cell.

### Analytical data

All isolated products were known and their spectral data were in accordance with those reported in the literature.

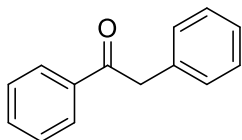

#### *1,2-Diphenylethan-1-one (2a):*

The product was isolated after flash chromatography on silica gel (light petroleum ether/EtOAc 95:5) as a white solid.<sup>1</sup>

<sup>1</sup>H NMR (400 MHz, CDCl<sub>3</sub>) δ 8.04-8.01 (m, 2H); 7.58-7.54 (m, 1H); 7.48-7.44 (m, 2H); 7.35-7.31 (m, 2H); 7.28-7.24 (m, 3H); 4.29 (s, 2H).

<sup>13</sup>C{<sup>1</sup>H} NMR (101 MHz, CDCl<sub>3</sub>) δ 197.77; 136.75; 134.68; 133.30; 129.61; 128.81; 128.79; 128.76; 127.03; 45.64.

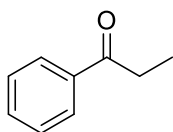

#### *Propiophenone (2b):*

The product was isolated after flash chromatography on silica gel (CH<sub>2</sub>Cl<sub>2</sub>/light petroleum ether 6:4) as a colourless oil.<sup>2</sup>

<sup>1</sup>H NMR (400 MHz, CDCl<sub>3</sub>) δ 7.98-7.96 (m, 2H); 7.57-7.53 (m, 1H); 7.48-7.44 (m, 2H); 3.01 (q, *J* = 7.24 Hz, 2H); 1.23 (t, *J* = 7.24 Hz, 3H).

<sup>13</sup>C{<sup>1</sup>H} NMR (101 MHz, CDCl<sub>3</sub>) δ 200.99; 137.07; 133.01; 128.69; 128.11; 31.92; 8.38.

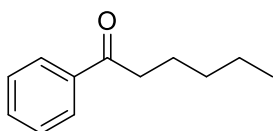

#### *1-Phenylhexan-1-one (2c):*

The product was isolated after flash chromatography on silica gel (light petroleum ether/EtOAc 97:3) as a colourless oil.<sup>3</sup>

<sup>1</sup>H NMR (400 MHz, CDCl<sub>3</sub>) δ 7.97-7.94 (m, 2H); 7.57-7.52 (m, 1H); 7.47-7.43 (m, 2H); 2.96 (t, *J* = 7.36 Hz, 2H); 1.78-1.70 (m, 2H); 1.40-1.34 (m, 4H); 0.93-0.89 (m, 3H).

$^{13}\text{C}\{^1\text{H}\}$  NMR (101 MHz,  $\text{CDCl}_3$ )  $\delta$  200.74; 137.21; 132.97; 128.66; 128.16; 38.70; 31.67; 24.18; 22.65; 14.08.

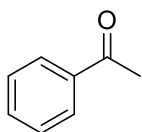

*Acetophenone (2d):*

The product was isolated after flash chromatography on silica gel (light petroleum ether/EtOAc 95:5) as a colourless oil.<sup>2</sup>

$^1\text{H}$  NMR (400 MHz,  $\text{CDCl}_3$ )  $\delta$  7.94-7.92 (m, 2H); 7.54-7.51 (m, 1H); 7.44-7.41 (m, 2H); 2.56 (s, 3H).

$^{13}\text{C}\{^1\text{H}\}$  NMR (101 MHz,  $\text{CDCl}_3$ )  $\delta$  198.07; 137.17; 133.09; 128.57; 128.30; 26.55.

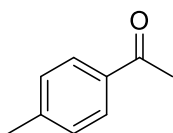

*1-(p-Tolyl)ethan-1-one (2e):*

The product was isolated after flash chromatography on silica gel (light petroleum ether/EtOAc 95:5) as a pale yellow oil.<sup>2</sup>

$^1\text{H}$  NMR (400 MHz,  $\text{CDCl}_3$ )  $\delta$  7.85-7.82 (m, 2H); 7.24-7.22 (m, 2H); 2.55 (s, 3H); 2.38 (s, 3H).

$^{13}\text{C}\{^1\text{H}\}$  NMR (101 MHz,  $\text{CDCl}_3$ )  $\delta$  197.94; 143.92; 134.73; 129.27; 128.48; 26.53; 21.64.

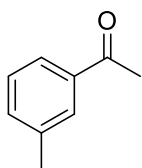

*1-(m-Tolyl)ethan-1-one (2f):*

The product was isolated after flash chromatography on silica gel (light petroleum ether/EtOAc 95:5) as a pale yellow oil.<sup>2</sup>

$^1\text{H}$  NMR (400 MHz,  $\text{CDCl}_3$ )  $\delta$  7.77-7.74 (m, 2H); 7.38-7.32 (m, 2H); 2.59 (s, 3H); 2.41 (s, 3H).

$^{13}\text{C}\{^1\text{H}\}$  NMR (101 MHz,  $\text{CDCl}_3$ )  $\delta$  198.54; 138.46; 137.27; 133.98; 128.90; 128.55; 125.70; 26.79; 21.44.

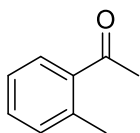

*1-(o-Tolyl)ethan-1-one (2g):*

The product was isolated after flash chromatography on silica gel (light petroleum ether/EtOAc 95:5) as a colourless oil.<sup>4</sup>

<sup>1</sup>H NMR (400 MHz, CDCl<sub>3</sub>) δ 7.60 (d, *J* = 7.80 Hz, 1H); 7.28 (td, *J*<sub>1</sub> = 7.48, *J*<sub>2</sub> = 1.16 Hz, 1H); 7.19-7.14 (m, 2H); 2.49 (s, 3H); 2.44 (s, 3H).

<sup>13</sup>C{<sup>1</sup>H} NMR (101 MHz, CDCl<sub>3</sub>) δ 201.80; 138.49; 137.70; 132.12; 131.60; 129.45; 125.78; 29.61; 21.67.

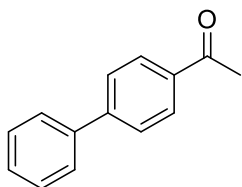

*1-([1,1'-Biphenyl]-4-yl)ethan-1-one (2h):*

The product was isolated after flash chromatography on silica gel (light petroleum ether/EtOAc 9:1) as a white solid.<sup>5</sup>

<sup>1</sup>H NMR (400 MHz, CDCl<sub>3</sub>) δ 8.05-8.02 (m, 2H); 7.71-7.68 (m, 2H); 7.65-7.62 (m, 2H); 7.50-7.45 (m, 2H); 7.43-7.38 (m, 1H); 2.64 (s, 3H).

<sup>13</sup>C{<sup>1</sup>H} NMR (101 MHz, CDCl<sub>3</sub>) δ 197.89; 145.90; 139.98; 135.96; 129.08; 129.04; 128.36; 127.39; 127.34; 26.79.

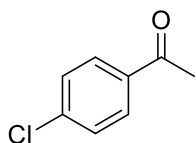

*1-(4-Chlorophenyl)ethan-1-one (2i):*

The product was isolated after flash chromatography on silica gel (light petroleum ether/EtOAc 95:5) as a colourless oil.<sup>4</sup>

<sup>1</sup>H NMR (400 MHz, CDCl<sub>3</sub>) δ 7.88 (d, *J* = 8.56 Hz, 2H); 7.41 (d, *J* = 8.52 Hz, 2H); 2.57 (s, 3H).

<sup>13</sup>C{<sup>1</sup>H} NMR (101 MHz, CDCl<sub>3</sub>) δ 196.90; 139.64; 135.51; 129.82; 128.97; 26.65.

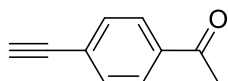

*1-(4-Ethynylphenyl)ethan-1-one (2j):*

The product was isolated after flash chromatography on silica gel (light petroleum ether/EtOAc 8:2) as a yellow solid.<sup>6</sup>

<sup>1</sup>H NMR (400 MHz, CDCl<sub>3</sub>) δ 7.89 (d, *J* = 8.40 Hz, 2H); 7.55 (d, *J* = 8.40 Hz, 2H); 3.25 (s, 1H); 2.58 (s, 3H).

<sup>13</sup>C{<sup>1</sup>H} NMR (101 MHz, CDCl<sub>3</sub>) δ 197.37; 136.84; 132.37; 128.28; 127.00; 82.84; 80.51; 26.72.

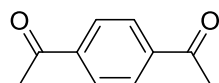

*1,1'-(1,4-Phenylene)bis(ethan-1-one) (2jj):*

The product was isolated after flash chromatography on silica gel (light petroleum ether/EtOAc 8:2) as a pinkish solid.<sup>7</sup>

<sup>1</sup>H NMR (400 MHz, CDCl<sub>3</sub>) δ 8.02 (s, 4H); 2.63 (s, 6H).

<sup>13</sup>C{<sup>1</sup>H} NMR (101 MHz, CDCl<sub>3</sub>) δ 197.61; 140.28; 128.61; 27.01.

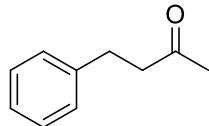

*4-Phenylbutan-2-one (2k):*

The product was isolated after flash chromatography on silica gel (light petroleum ether/EtOAc 95:5) as a colourless oil.<sup>4</sup>

<sup>1</sup>H NMR (400 MHz, CDCl<sub>3</sub>) δ 7.30-7.28 (m, 2H); 7.21-7.17 (m, 3H); 2.90 (t, *J* = 7.40 Hz, 2H); 2.76 (t, *J* = 7.40 Hz, 2H); 2.14 (s, 3H).

<sup>13</sup>C{<sup>1</sup>H} NMR (101 MHz, CDCl<sub>3</sub>) δ 208.15; 141.13; 128.65; 128.44; 126.26; 45.34; 30.24; 29.88.

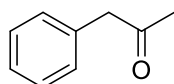

*1-Phenylpropan-2-one (2l):*

The product was isolated after flash chromatography on silica gel (light petroleum ether/EtOAc 9:1) as a pale yellow oil.<sup>4</sup>

<sup>1</sup>H NMR (400 MHz, CDCl<sub>3</sub>) δ 7.34-7.30 (m, 2H); 7.27-7.24 (m, 1H); 7.20-7.18 (m, 2H); 3.68 (s, 2H); 2.14 (s, 3H).

$^{13}\text{C}\{^1\text{H}\}$  NMR (101 MHz,  $\text{CDCl}_3$ )  $\delta$  206.61; 134.37; 129.53; 128.90; 127.21; 51.18; 29.41.

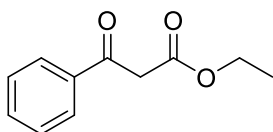

*Ethyl 3-oxo-3-phenylpropanoate (2m):*

The product was isolated after flash chromatography on silica gel (light petroleum ether/EtOAc 9:1) as a mixture of ketone and enol forms (5:1), as a yellow oil.<sup>8</sup>

Ketone:  $^1\text{H}$  NMR (400 MHz,  $\text{CDCl}_3$ )  $\delta$  7.95-7.93 (m, 2H); 7.61-7.57 (m, 1H); 7.49-7.46 (m, 2H); 4.21 (q,  $J = 7.16$  Hz, 2H); 3.99 (s, 2H); 1.25 (t,  $J = 7.12$  Hz, 3H).

$^{13}\text{C}\{^1\text{H}\}$  NMR (101 MHz,  $\text{CDCl}_3$ )  $\delta$  192.65; 167.63; 131.34; 128.88; 128.61; 126.15; 61.58; 46.11; 14.17.

Enol:  $^1\text{H}$  NMR (400 MHz,  $\text{CDCl}_3$ )  $\delta$  12.58 (s, 1H); 7.78-7.76 (m, 2H); 7.44-7.39 (m, 3H); 5.66 (s, 1H); 4.26 (q,  $J = 7.16$  Hz, 2H); 1.33 (t,  $J = 7.12$  Hz, 3H).

$^{13}\text{C}\{^1\text{H}\}$  NMR (101 MHz,  $\text{CDCl}_3$ )  $\delta$  173.31; 171.54; 136.14; 133.84; 133.56; 128.64; 87.50; 60.43; 14.41.

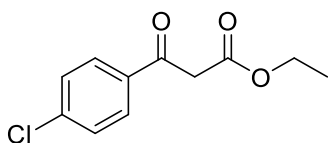

*Ethyl 3-(4-chlorophenyl)-3-oxopropanoate (2n):*

The product was isolated after flash chromatography on silica gel ( $\text{CH}_2\text{Cl}_2$ /light petroleum ether 1:1) as a mixture of ketone and enol forms (3.8:1), as a yellow oil.<sup>9</sup>

Ketone:  $^1\text{H}$  NMR (400 MHz,  $\text{CDCl}_3$ )  $\delta$  7.87 (d,  $J = 8.60$  Hz, 2H); 7.45 (d,  $J = 8.56$  Hz, 2H); 4.20 (q,  $J = 7.16$  Hz, 2H); 3.95 (s, 2H); 1.25 (t,  $J = 7.16$  Hz, 3H).

$^{13}\text{C}\{^1\text{H}\}$  NMR (101 MHz,  $\text{CDCl}_3$ )  $\delta$  191.45; 167.34; 140.43; 134.46; 130.06; 129.25; 61.74; 46.08; 14.18.

Enol:  $^1\text{H}$  NMR (400 MHz,  $\text{CDCl}_3$ )  $\delta$  12.57 (s, 1H); 7.69 (d,  $J = 8.64$  Hz, 2H); 7.38 (d,  $J = 8.60$  Hz, 2H); 5.63 (s, 1H); 4.26 (q,  $J = 7.12$  Hz, 2H); 1.33 (t,  $J = 7.12$  Hz, 3H).

$^{13}\text{C}\{^1\text{H}\}$  NMR (101 MHz,  $\text{CDCl}_3$ )  $\delta$  173.18; 170.25; 137.42; 132.02; 128.94; 127.48; 87.79; 60.59; 14.40.



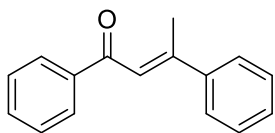

*(E)*-1,3-Diphenylbut-2-en-1-one (**3d**):

The product was isolated after flash chromatography on silica gel (light petroleum ether/EtOAc 95:5) as a pale yellow oil.<sup>10</sup>

<sup>1</sup>H NMR (400 MHz, CDCl<sub>3</sub>) δ 8.02-7.99 (m, 2H); 7.59-7.54 (m, 3H); 7.50-7.40 (m, 5H); 7.17 (q, *J* = 1.28 Hz, 1H); 2.60 (d, *J* = 1.28 Hz, 3H).

<sup>13</sup>C{<sup>1</sup>H} NMR (101 MHz, CDCl<sub>3</sub>) δ 192.04; 155.25; 142.93; 139.50; 132.69; 129.27; 128.75; 128.69; 128.43; 126.64; 122.27; 19.03.

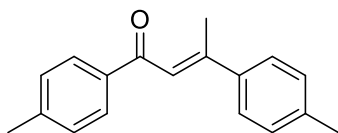

*(E)*-1,3-Di-*p*-tolylbut-2-en-1-one (**3e**):

The product was isolated after flash chromatography on silica gel (light petroleum ether/EtOAc 98:2) as a pale yellow solid.<sup>10</sup>

<sup>1</sup>H NMR (400 MHz, CDCl<sub>3</sub>) δ 7.92-7.89 (m, 2H); 7.50-7.47 (m, 2H); 7.28-7.26 (m, 2H); 7.24-7.22 (m, 2H); 7.16 (q, *J* = 1.28 Hz, 1H); 2.58 (d, *J* = 1.24 Hz, 3H); 2.42 (s, 3H); 2.40 (s, 3H).

<sup>13</sup>C{<sup>1</sup>H} NMR (101 MHz, CDCl<sub>3</sub>) δ 191.75; 154.64; 143.32; 140.04; 139.37; 137.09; 129.42; 129.34; 128.54; 126.54; 121.61; 21.76; 21.36; 18.87.

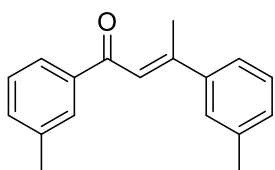

*(E)*-1,3-di-*m*-tolylbut-2-en-1-one (**3f**):

The product was isolated after flash chromatography on silica gel (light petroleum ether/EtOAc 95:5) as a pale yellow oil.<sup>10</sup>

<sup>1</sup>H NMR (400 MHz, CDCl<sub>3</sub>) δ 7.80-7.78 (m, 2H); 7.38-7.29 (m, 5H); 7.23-7.21 (m, 1H); 7.14 (q, *J* = 1.24 Hz, 1H); 2.58 (d, *J* = 1.28 Hz, 3H); 2.43 (s, 3H); 2.42 (s, 3H).

<sup>13</sup>C{<sup>1</sup>H} NMR (101 MHz, CDCl<sub>3</sub>) δ 192.32; 155.22; 143.02; 139.59; 138.47; 138.38; 133.43; 129.99; 128.96; 128.64; 128.55; 127.34; 125.64; 123.78; 122.33; 21.66; 21.55; 19.08.

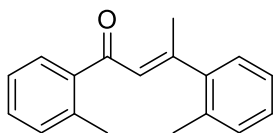

*1,3-Di-o-tolylbut-2-en-1-one* (*E/Z* mixture 1/0.25) (**3g**):

The product was isolated after flash chromatography on silica gel (light petroleum ether/EtOAc 95:5).<sup>10</sup>

<sup>1</sup>H NMR (400 MHz, CDCl<sub>3</sub>) δ 7.57 (d, *J* = 7.76 Hz, 1H *E* isomer); 7.48-7.45 (m, 1H *Z* isomer); 7.36-7.33 (m, 1H *E* isomer); 7.26-7.06 (m, 6H *E* isomer + 6H *Z* isomer); 6.94-6.92 (m, 1H, *Z* isomer); 6.64 (d, *J* = 1.32 Hz, 1H *Z* isomer); 6.53 (d, *J* = 1.36 Hz, 1H *E* isomer); 2.54 (s, 3H *E* isomer); 2.45 (d, *J* = 1.32 Hz, 3H *E* isomer); 2.36 (s, 3H *E* isomer); 2.32 (s, 3H *Z* isomer); 2.22 (s, 3H *Z* isomer); 2.19-2.17 (m, 3H, *Z* isomer).

<sup>13</sup>C{<sup>1</sup>H} NMR (101 MHz, CDCl<sub>3</sub>) δ 196.00; 157.38; 144.41; 137.58; 134.11; 131.74; 131.31; 130.93; 130.65; 130.00; 128.60; 127.90; 127.74; 127.57; 127.41; 127.30; 126.63; 125.95; 125.77; 125.64; 125.22; 27.15; 21.62; 20.84; 20.52; 20.08; 19.54.

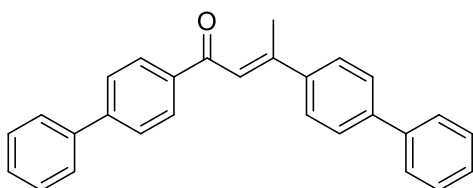

*(E)-1,3-di([1,1'-biphenyl]-4-yl)but-2-en-1-one* (**3h**):

The product was isolated after flash chromatography on silica gel (CH<sub>2</sub>Cl<sub>2</sub>/light petroleum ether 7:3) as a yellow solid.<sup>11</sup>

<sup>1</sup>H NMR (400 MHz, CDCl<sub>3</sub>) δ 8.11-8.09 (m, 2H); 7.73-7.63 (m, 10H); 7.50-7.37 (m, 6H); 7.29 (d, *J* = 1.24 Hz, 1H); 2.66 (d, *J* = 1.16 Hz, 3H).

<sup>13</sup>C{<sup>1</sup>H} NMR (101 MHz, CDCl<sub>3</sub>) δ 190.51; 153.69; 144.42; 141.20; 140.69; 139.45; 139.18; 137.27; 128.10; 128.05; 127.30; 126.86; 126.44; 126.39; 126.22; 126.15; 121.06; 17.94.

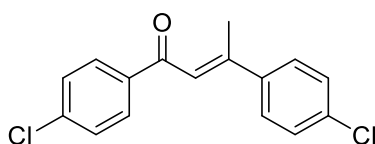

*(E)-1,3-Bis(4-chlorophenyl)but-2-en-1-one* (**3i**):

The product was isolated after flash chromatography on silica gel (light petroleum ether/EtOAc 95:5) as a pale yellow solid.<sup>10</sup>

$^1\text{H}$  NMR (400 MHz,  $\text{CDCl}_3$ )  $\delta$  7.92 (d,  $J = 8.56$  Hz, 2H); 7.50 (d,  $J = 8.60$  Hz, 2H); 7.45 (d,  $J = 8.52$  Hz, 2H); 7.39 (d,  $J = 8.60$  Hz, 2H); 7.08 (d,  $J = 1.12$  Hz, 1H); 2.56 (d,  $J = 1.08$  Hz, 3H).

$^{13}\text{C}\{^1\text{H}\}$  NMR (101 MHz,  $\text{CDCl}_3$ )  $\delta$  190.46; 154.53; 141.08; 139.22; 137.62; 135.45; 129.84; 129.04; 129.01; 127.94; 121.92; 18.99.

$^1\text{H}$  and  $^{13}\text{C}\{^1\text{H}\}$  NMR spectra in  $\text{CDCl}_3$

1,2-Diphenylethan-1-one (2a)

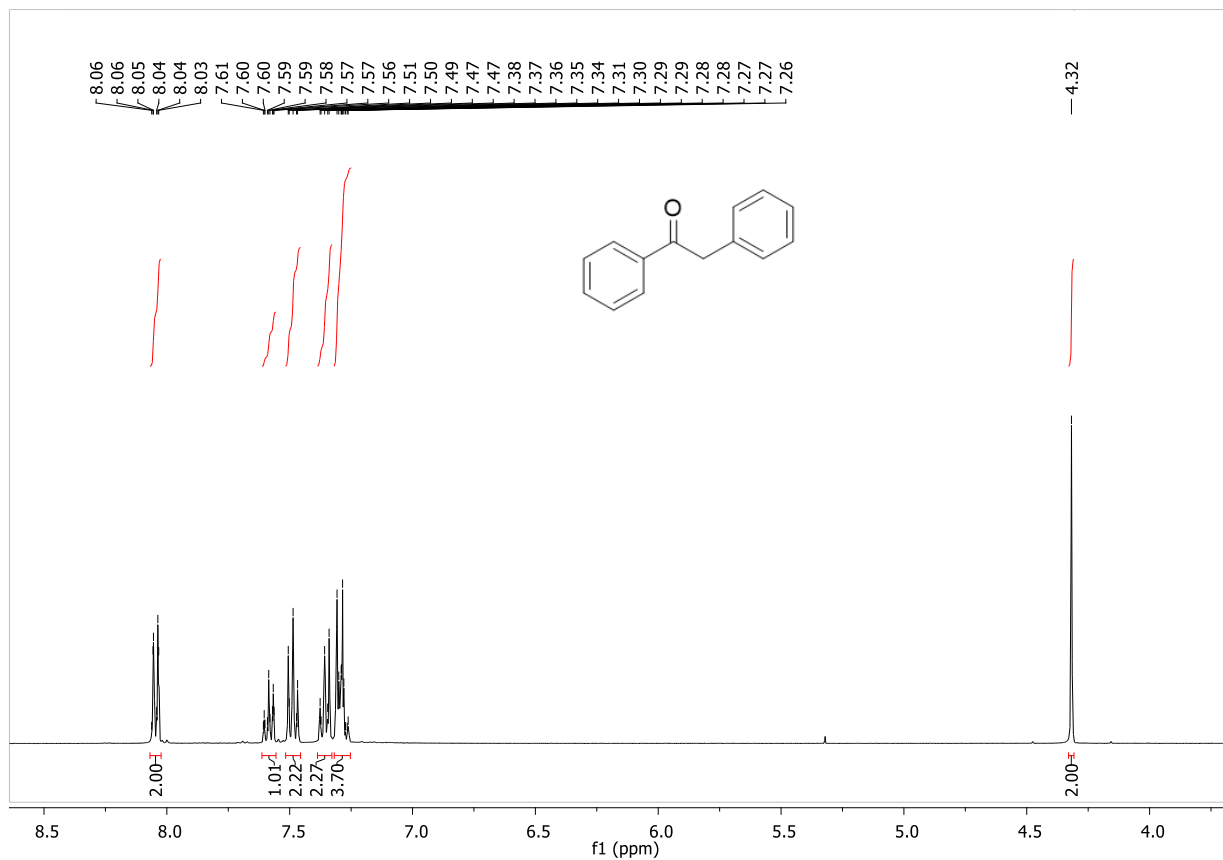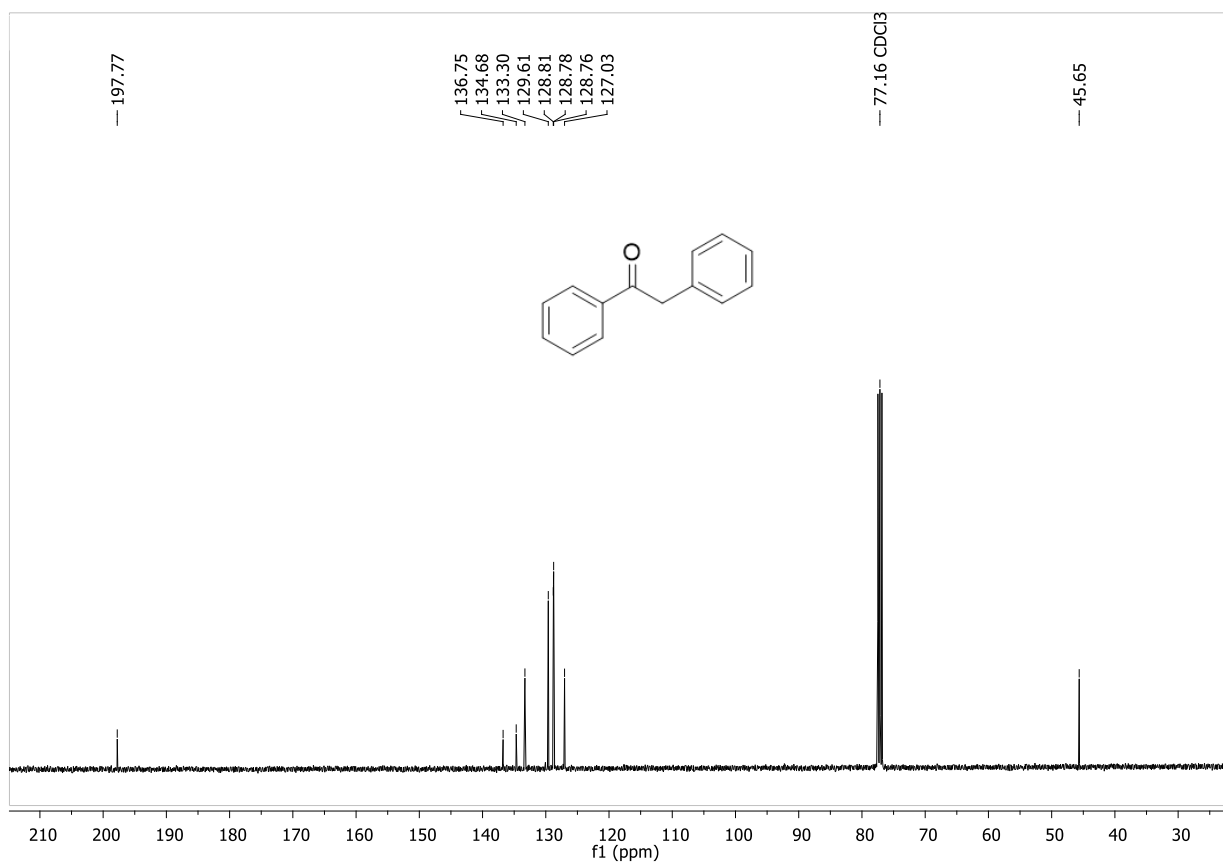

# Propiophenone (2b)

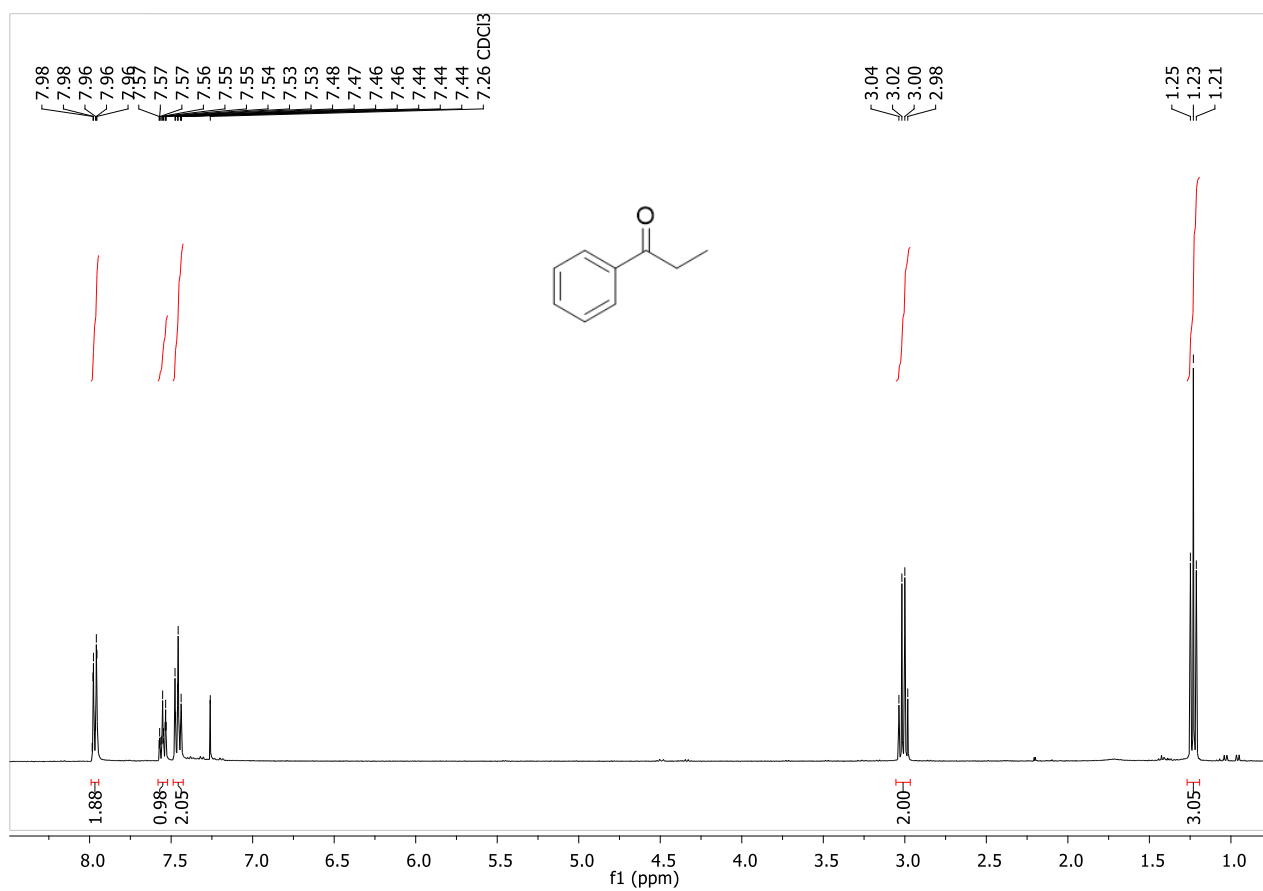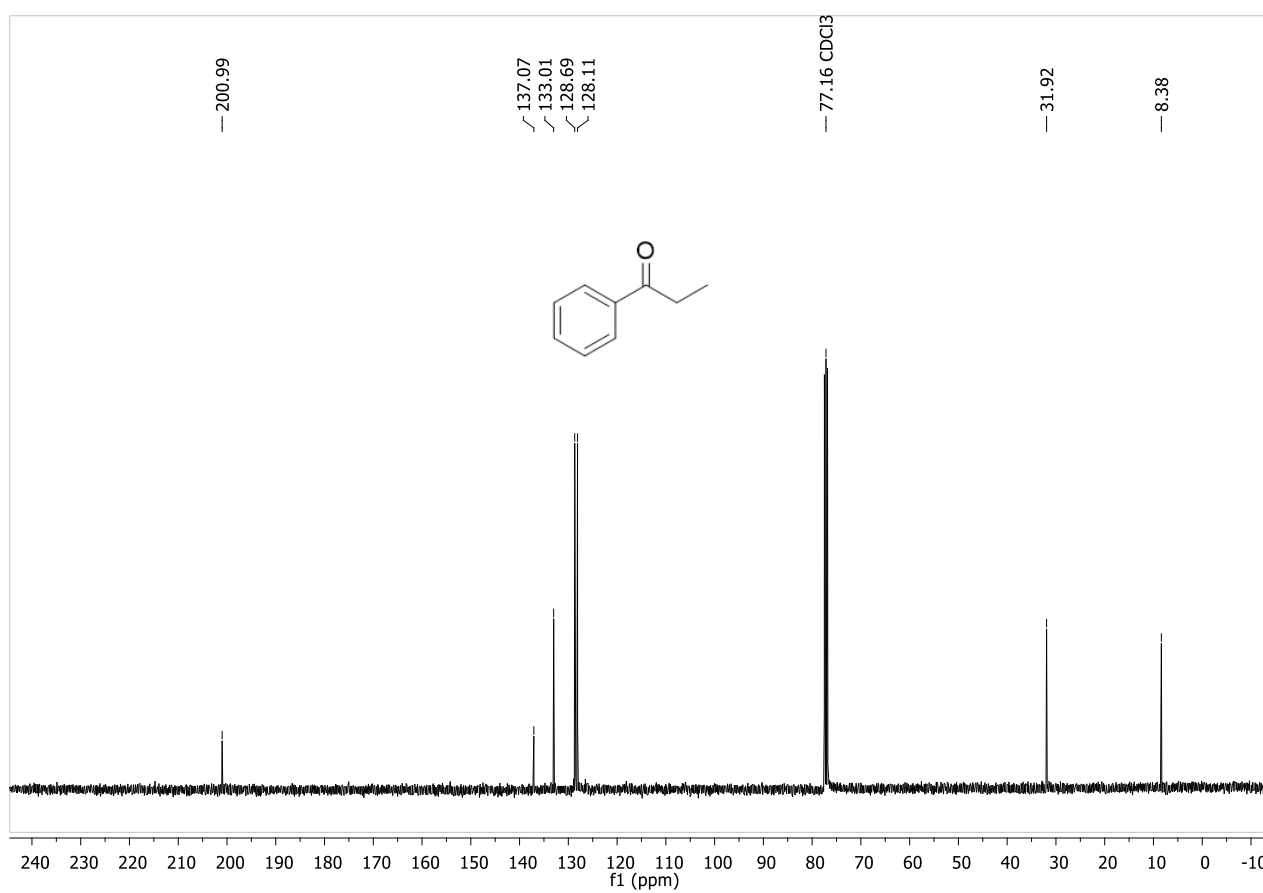

# 1-Phenylhexan-1-one (2c)

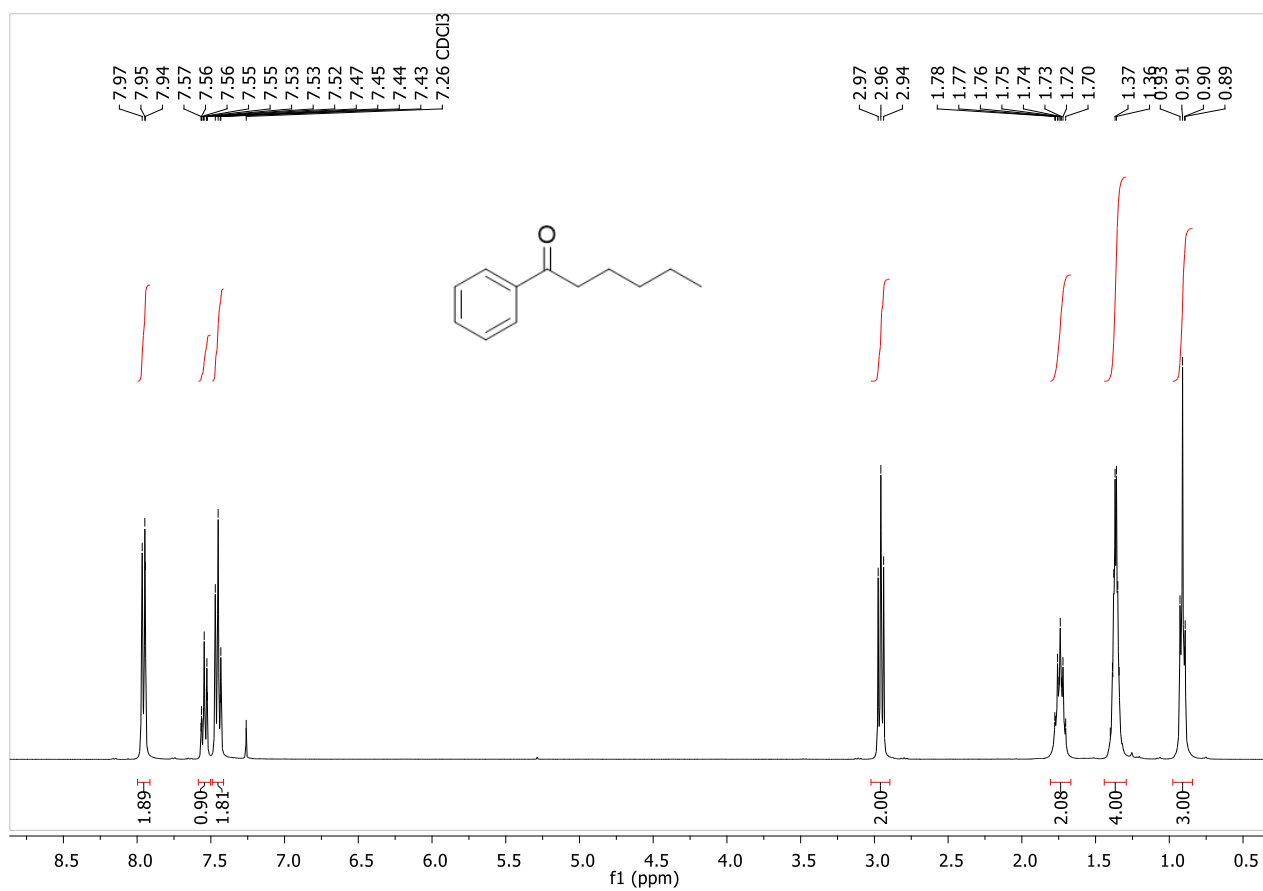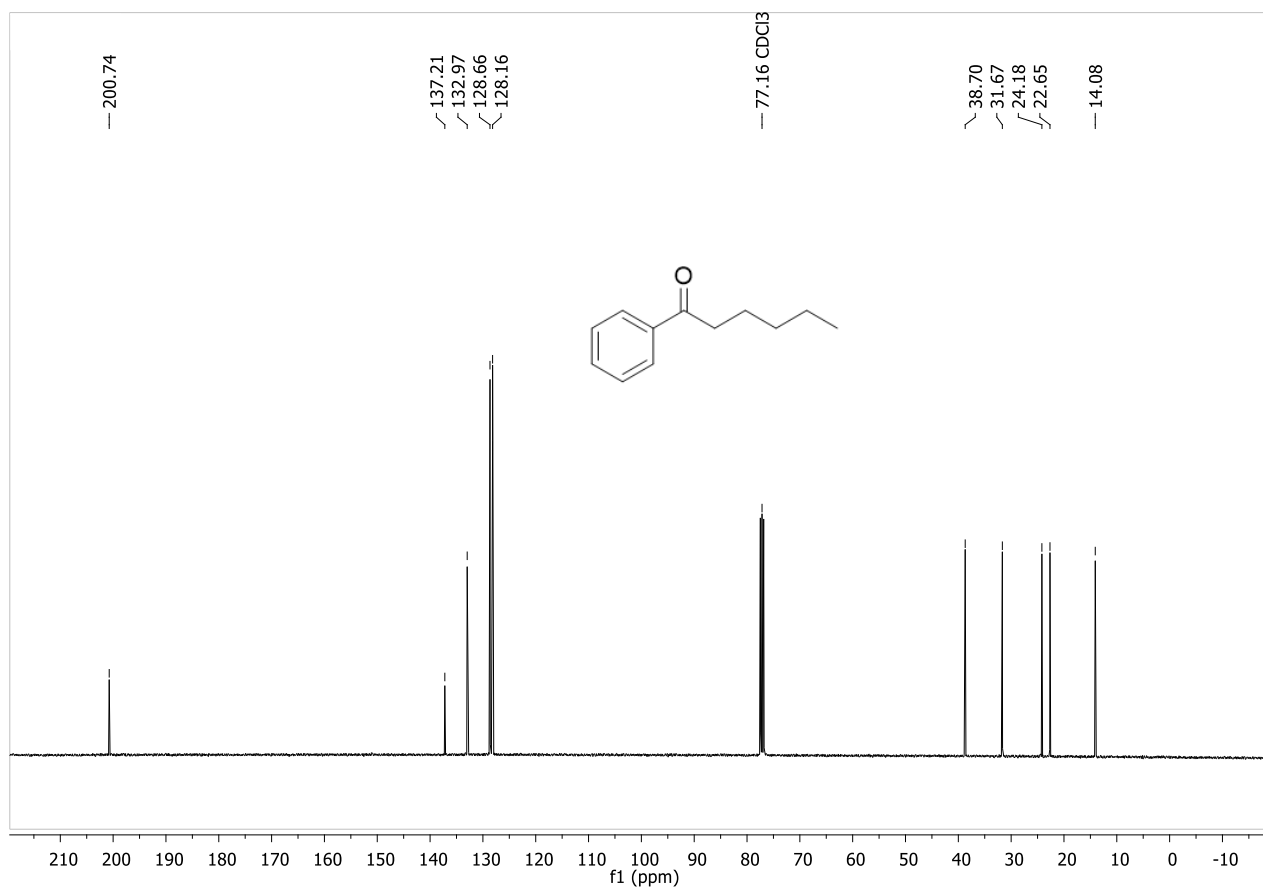

# Acetophenone (2d)

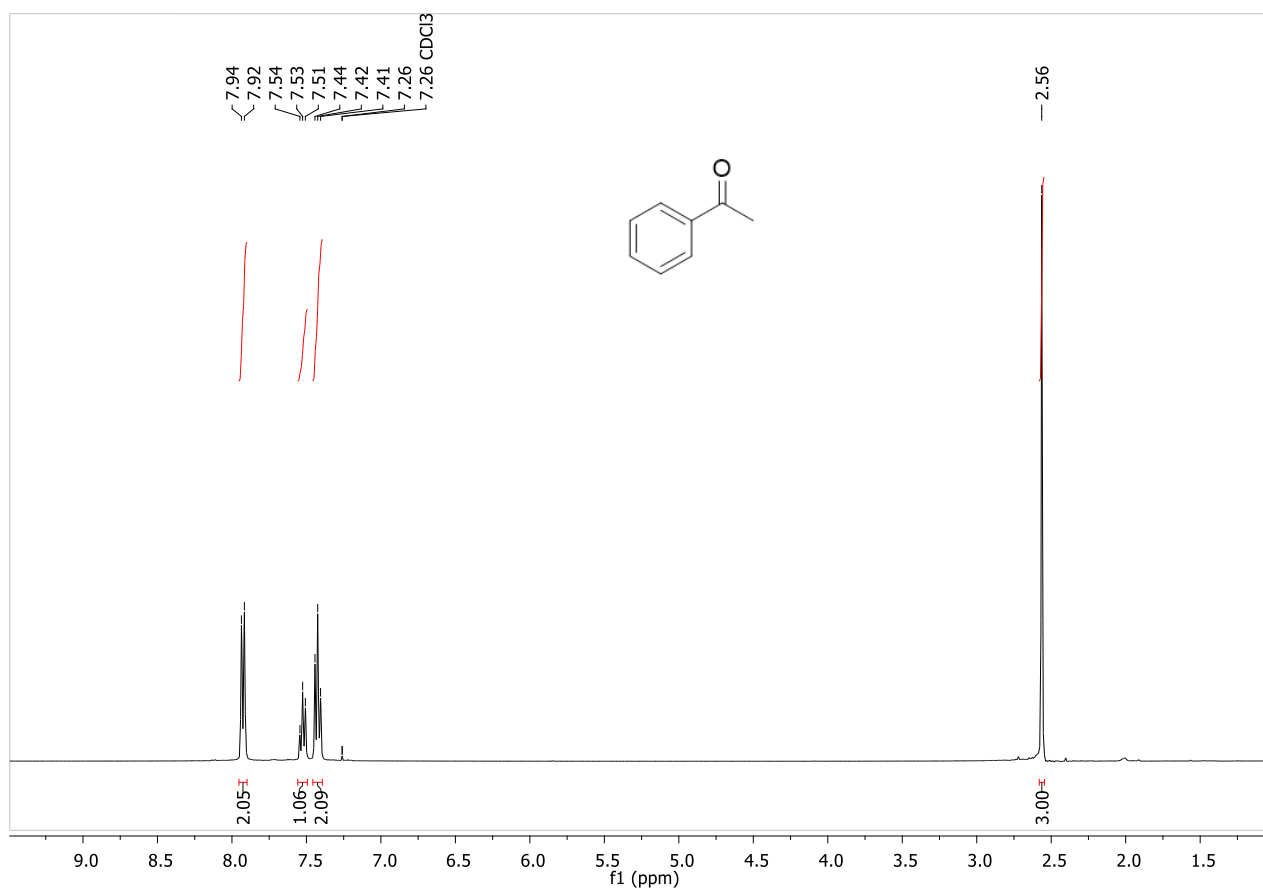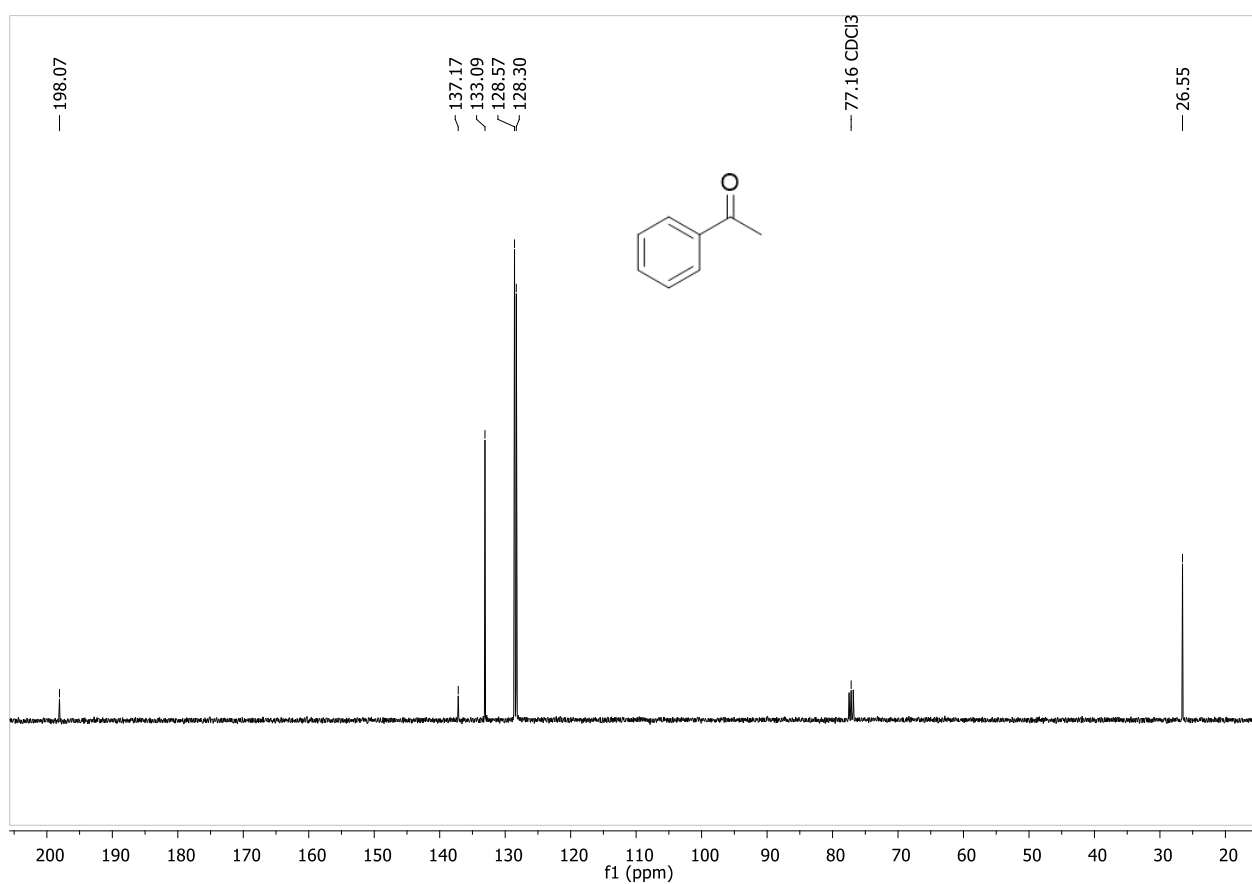

# 1-(*p*-Tolyl)ethan-1-one (2e)

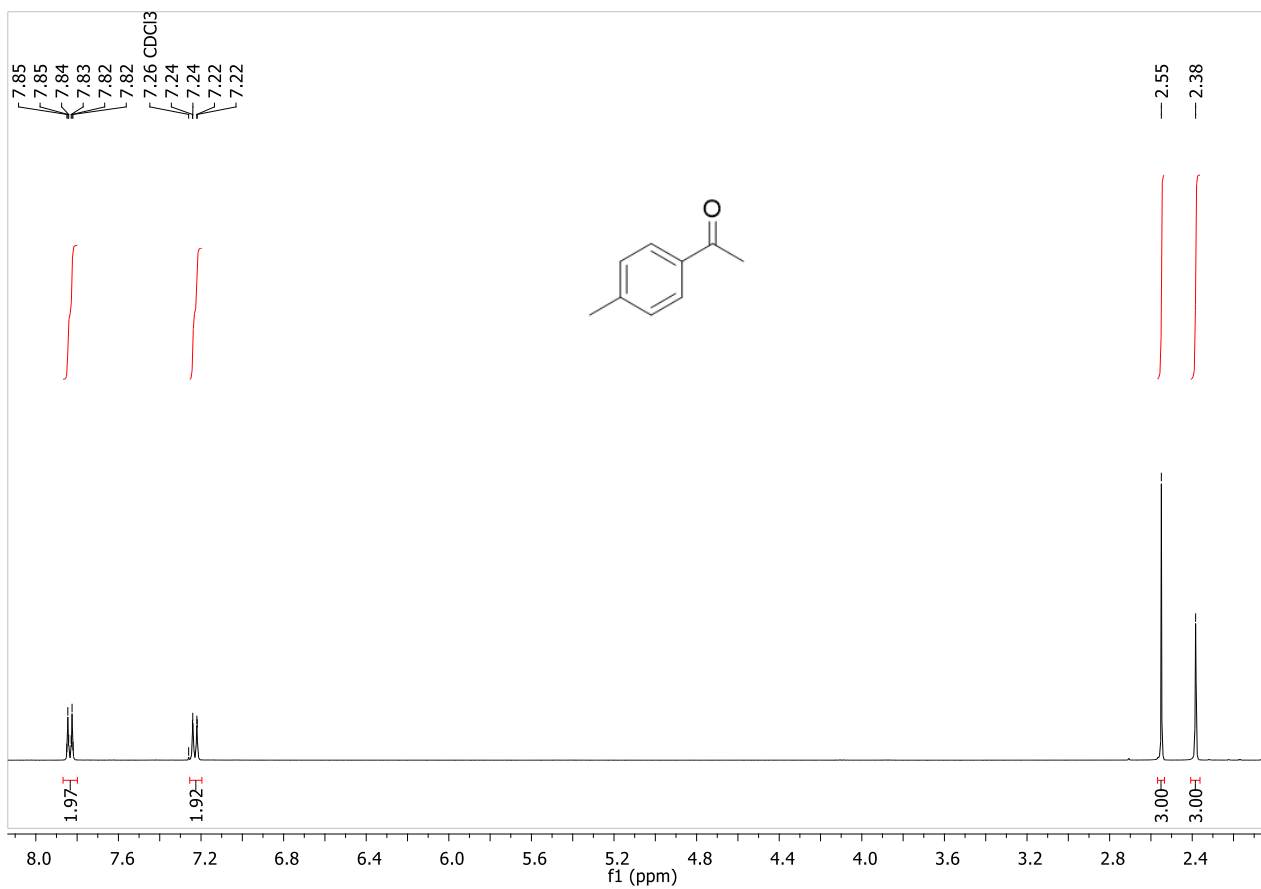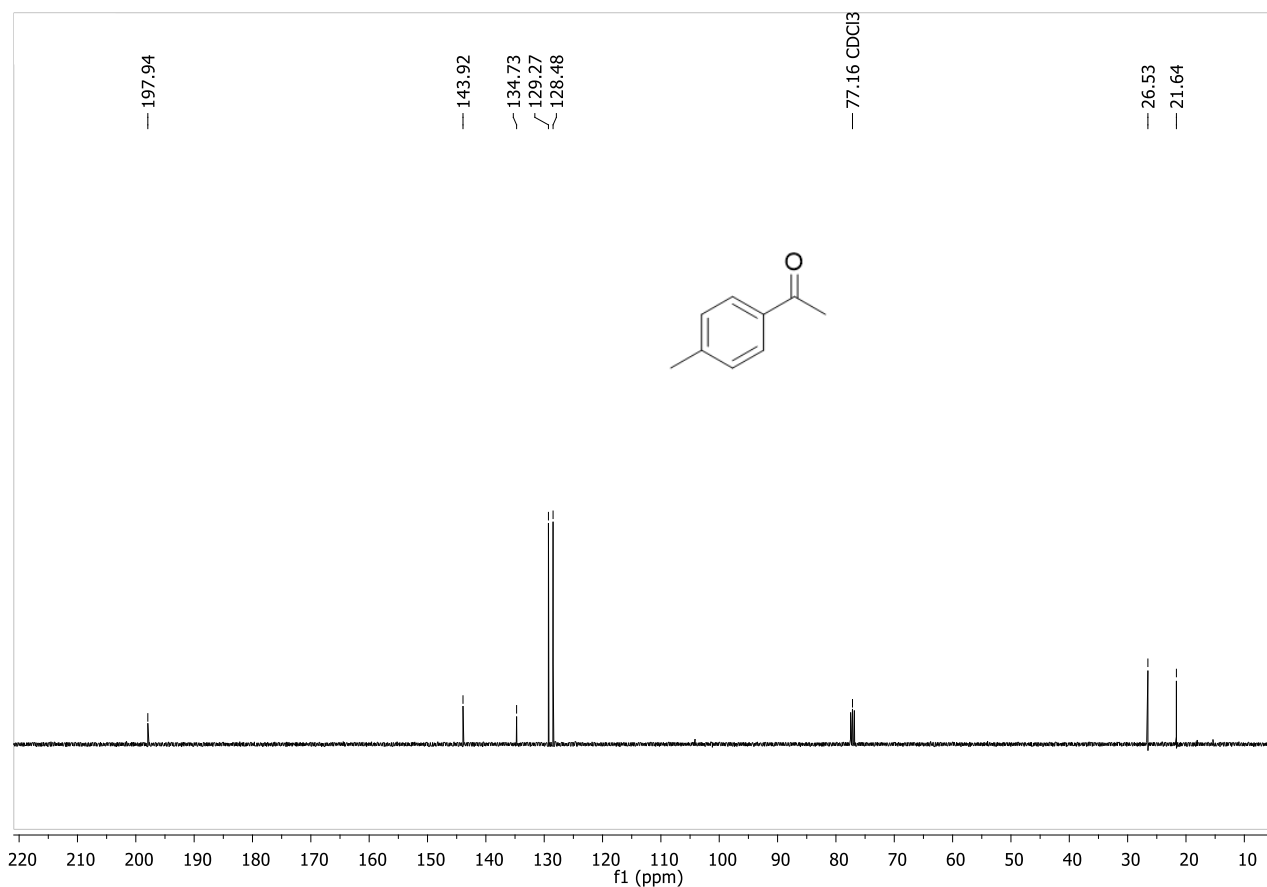



# 1-(*m*-Tolyl)ethan-1-one (2f)

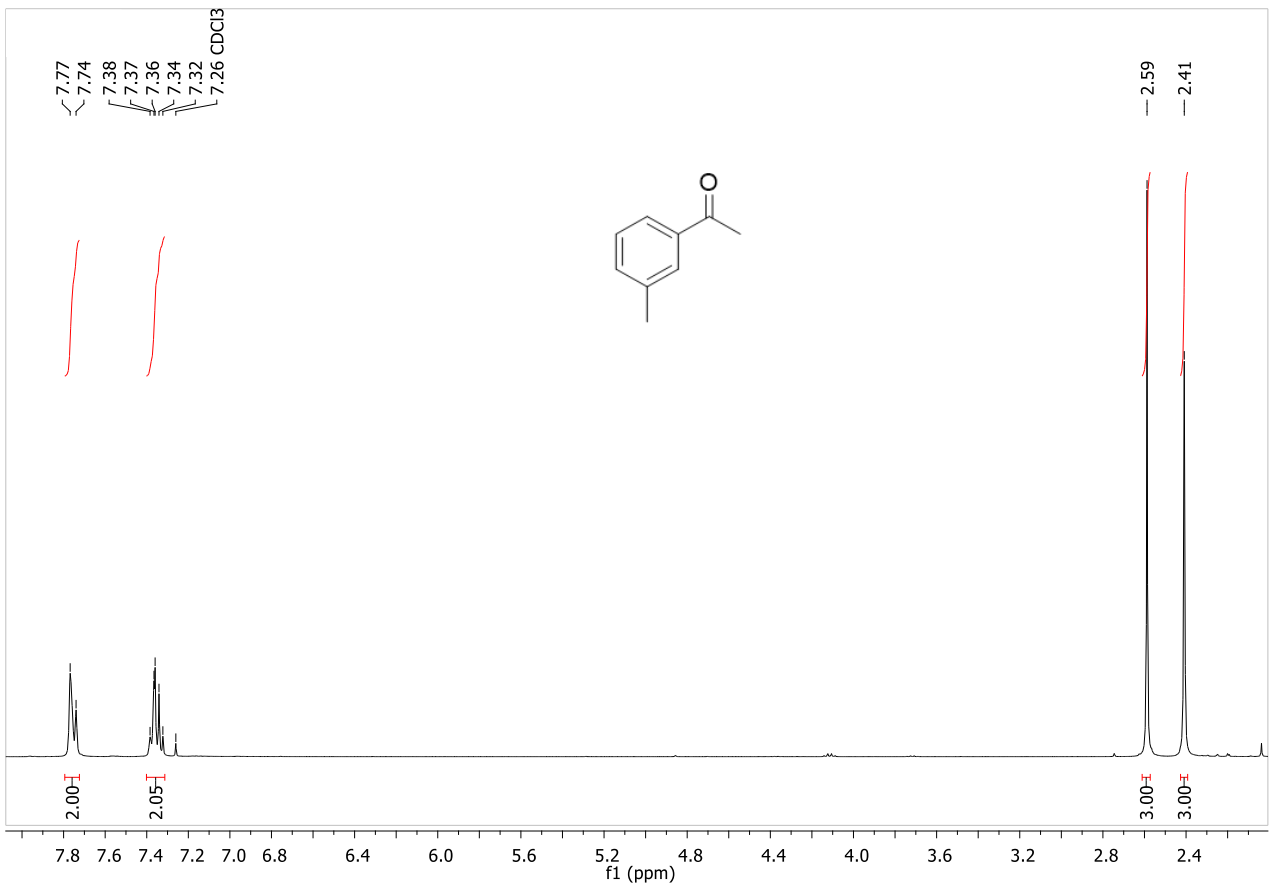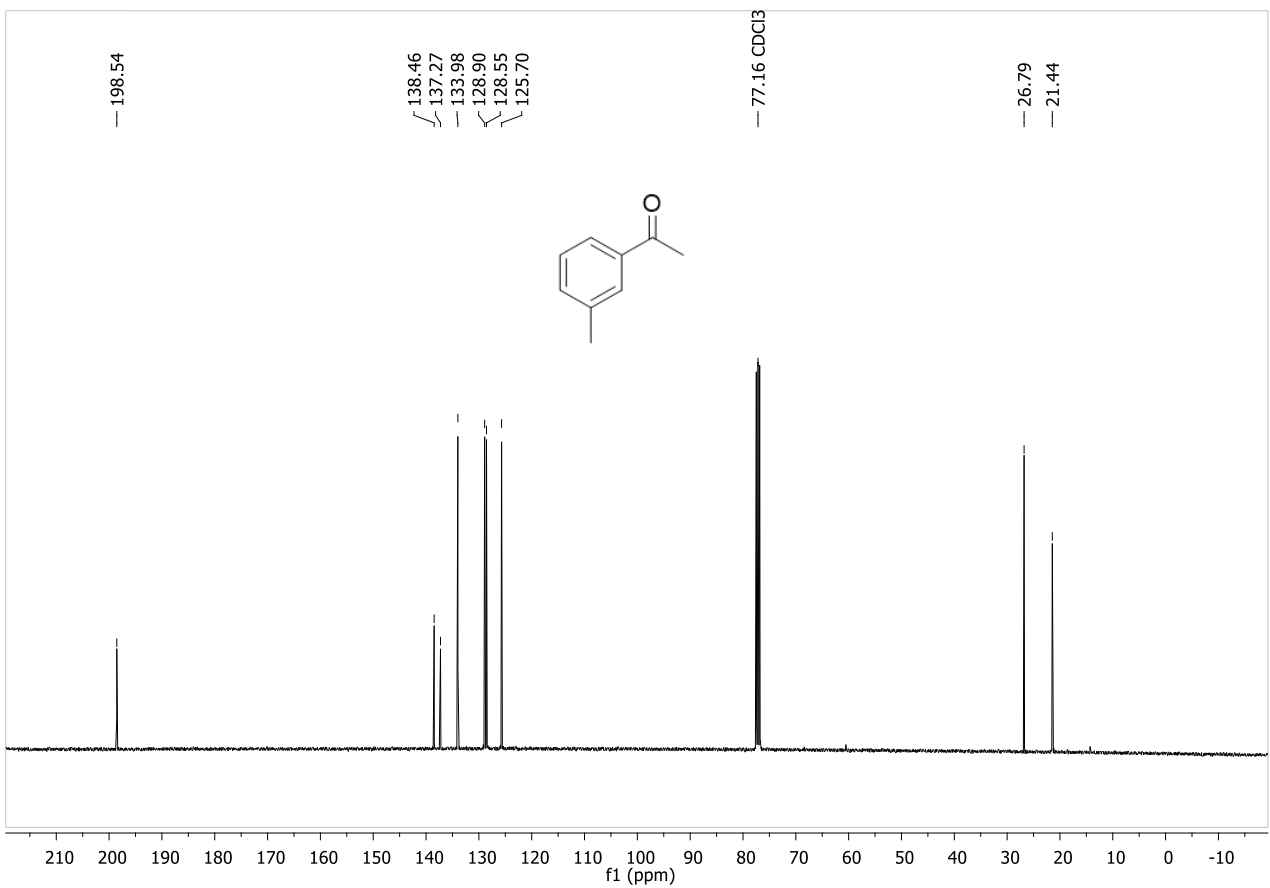

# 1-(*o*-Tolyl)ethan-1-one (2g)

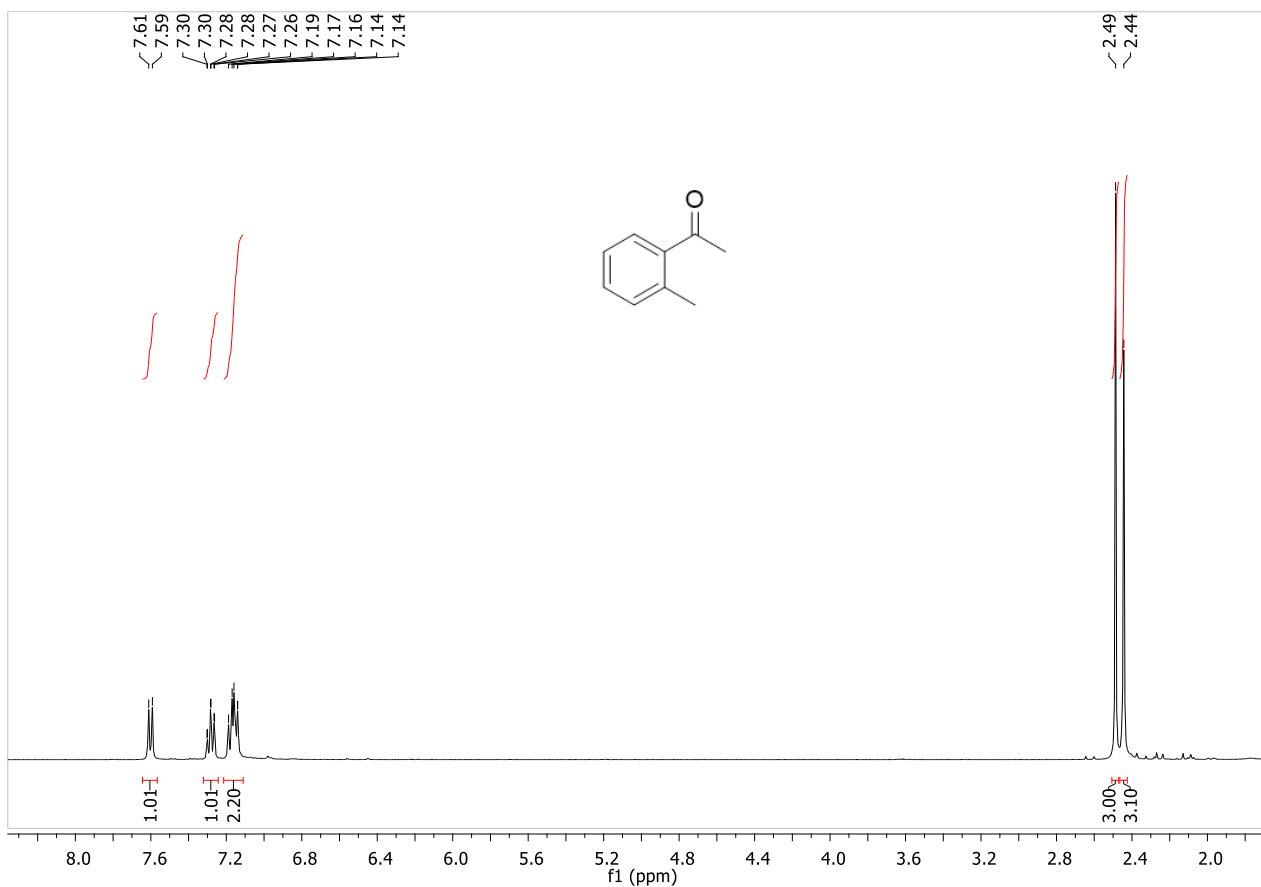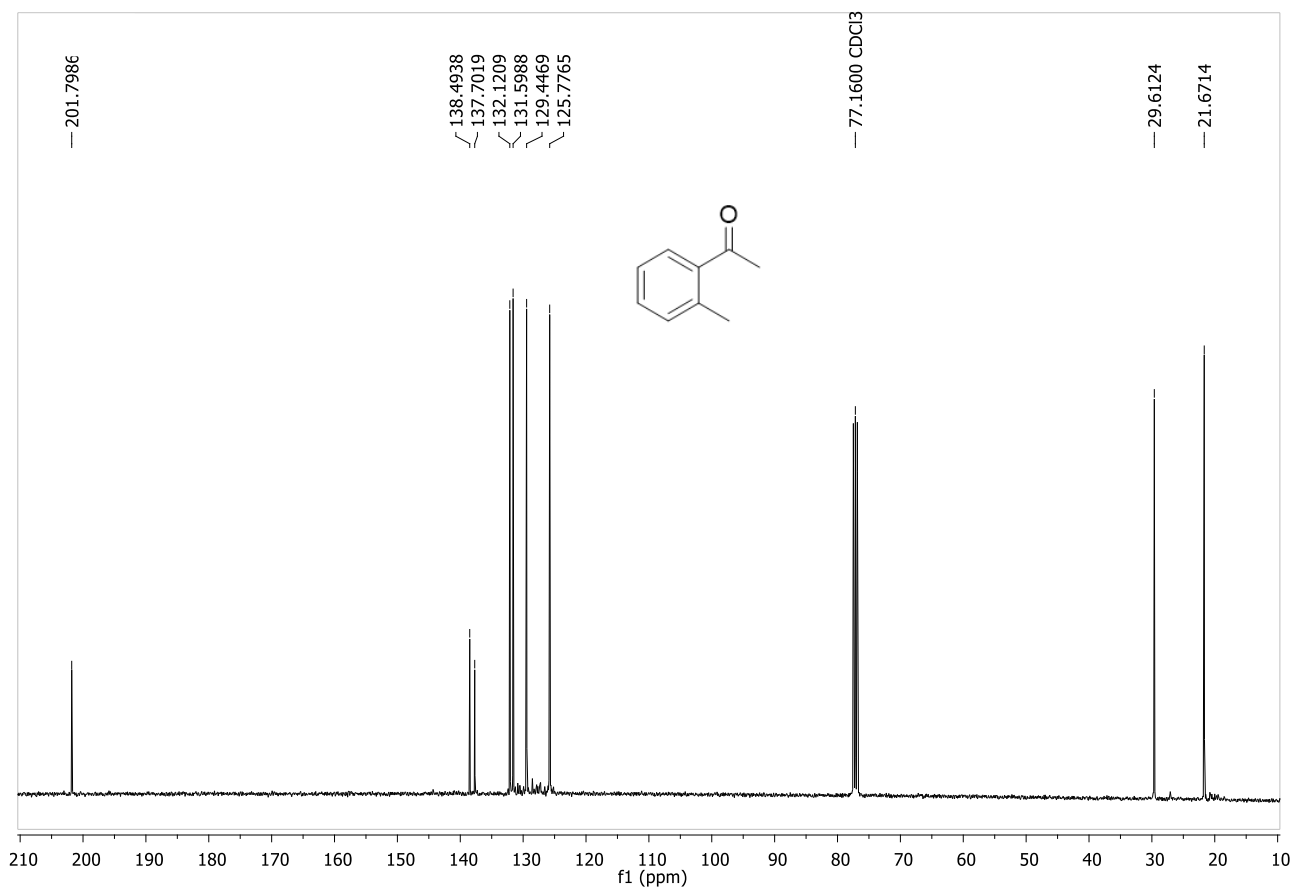

# 1-([1,1'-Biphenyl]-4-yl)ethan-1-one (2h)

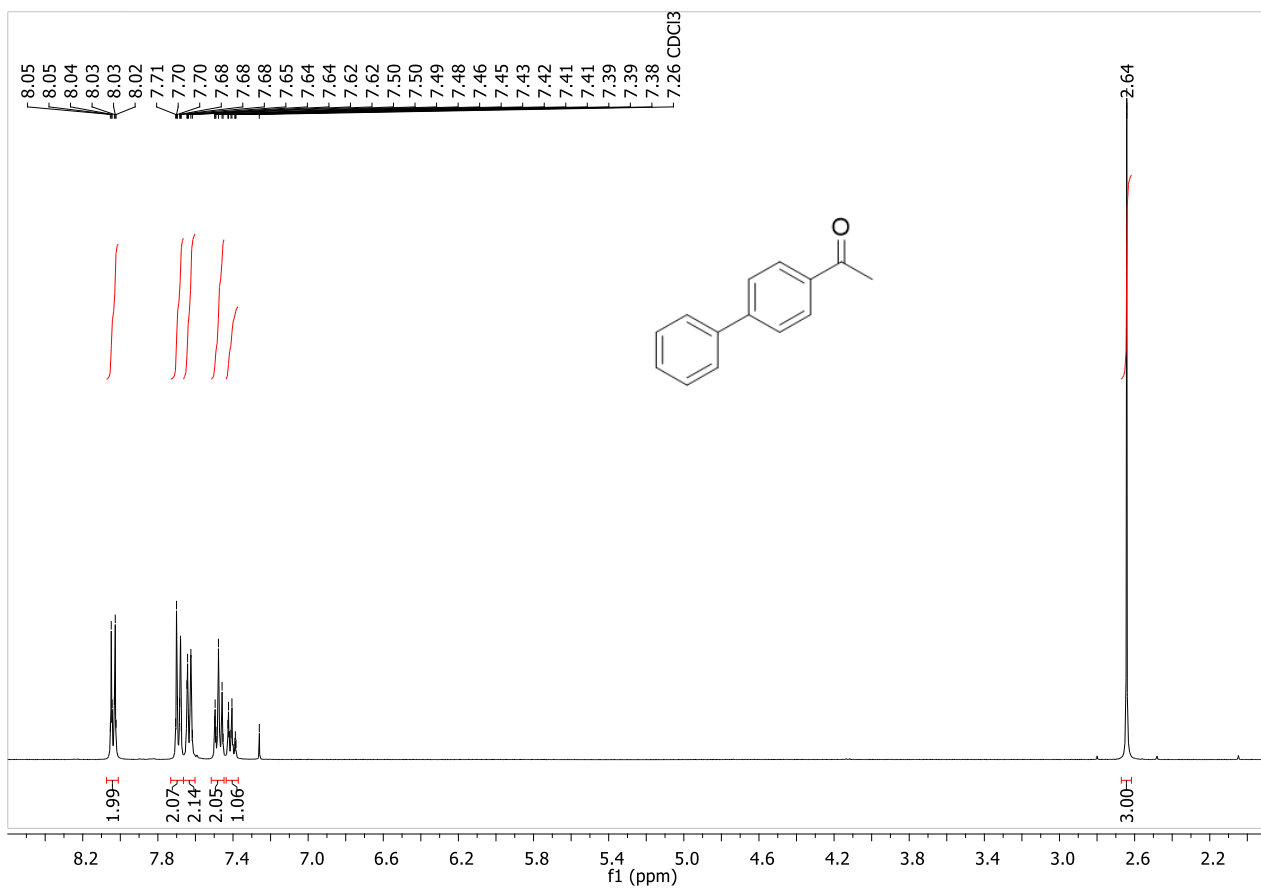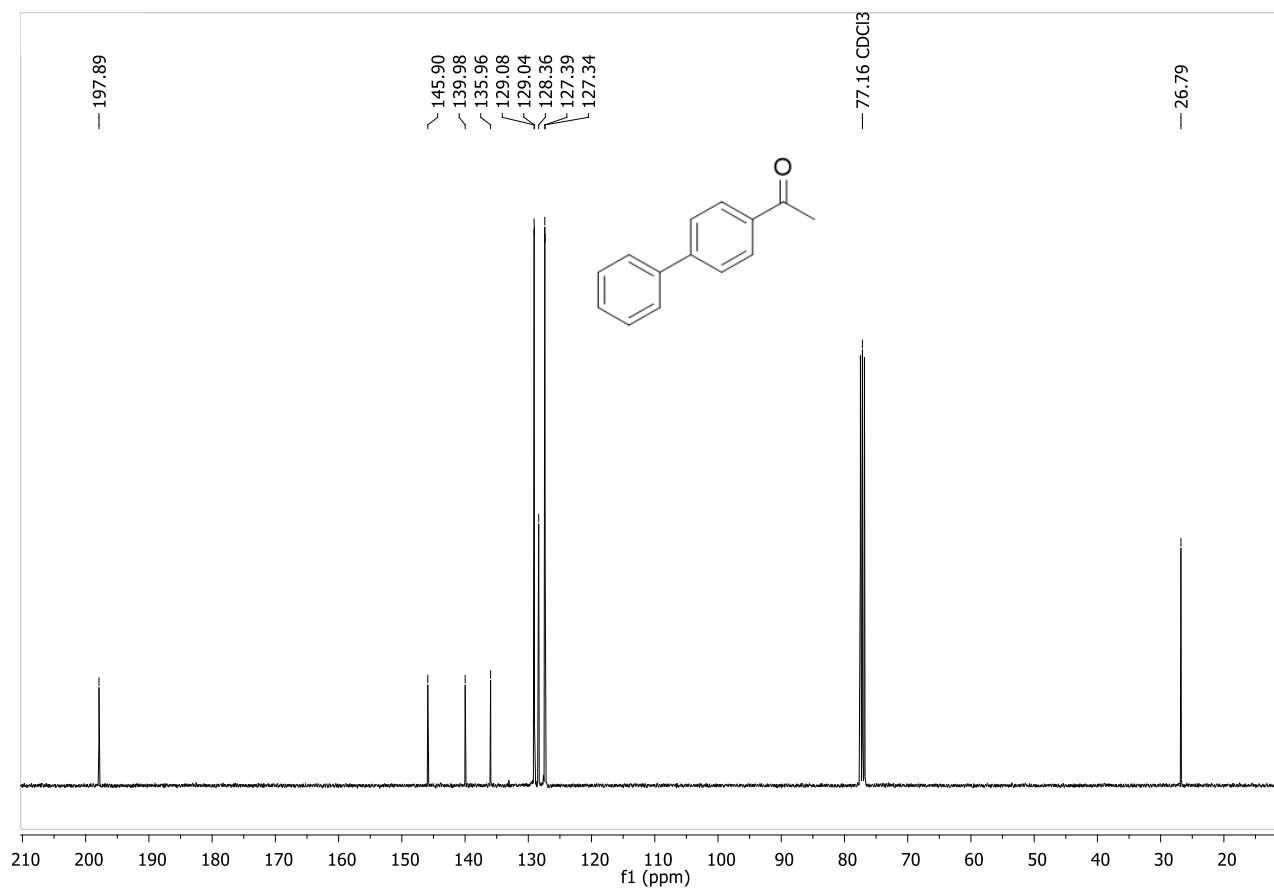

# 1-(4-Chlorophenyl)ethan-1-one (2i)

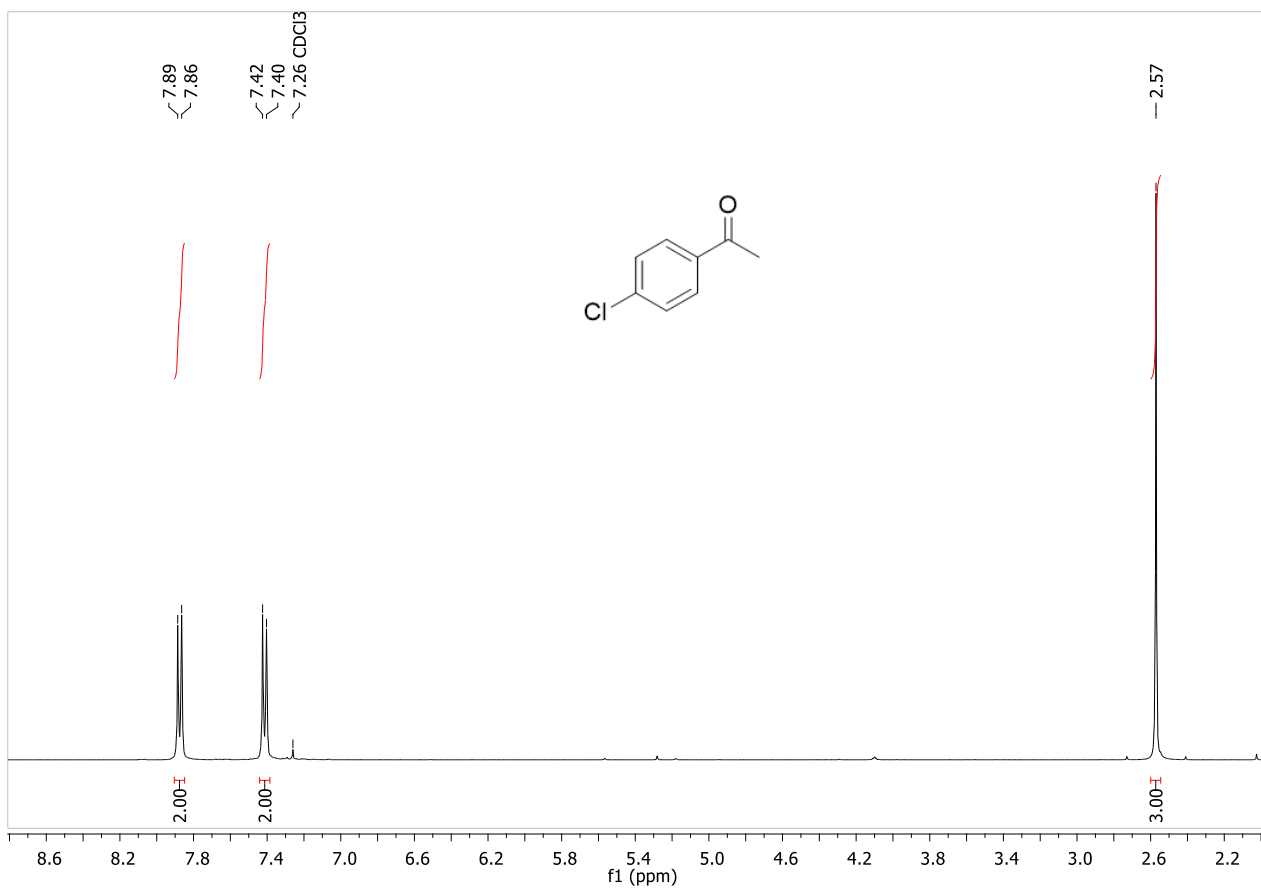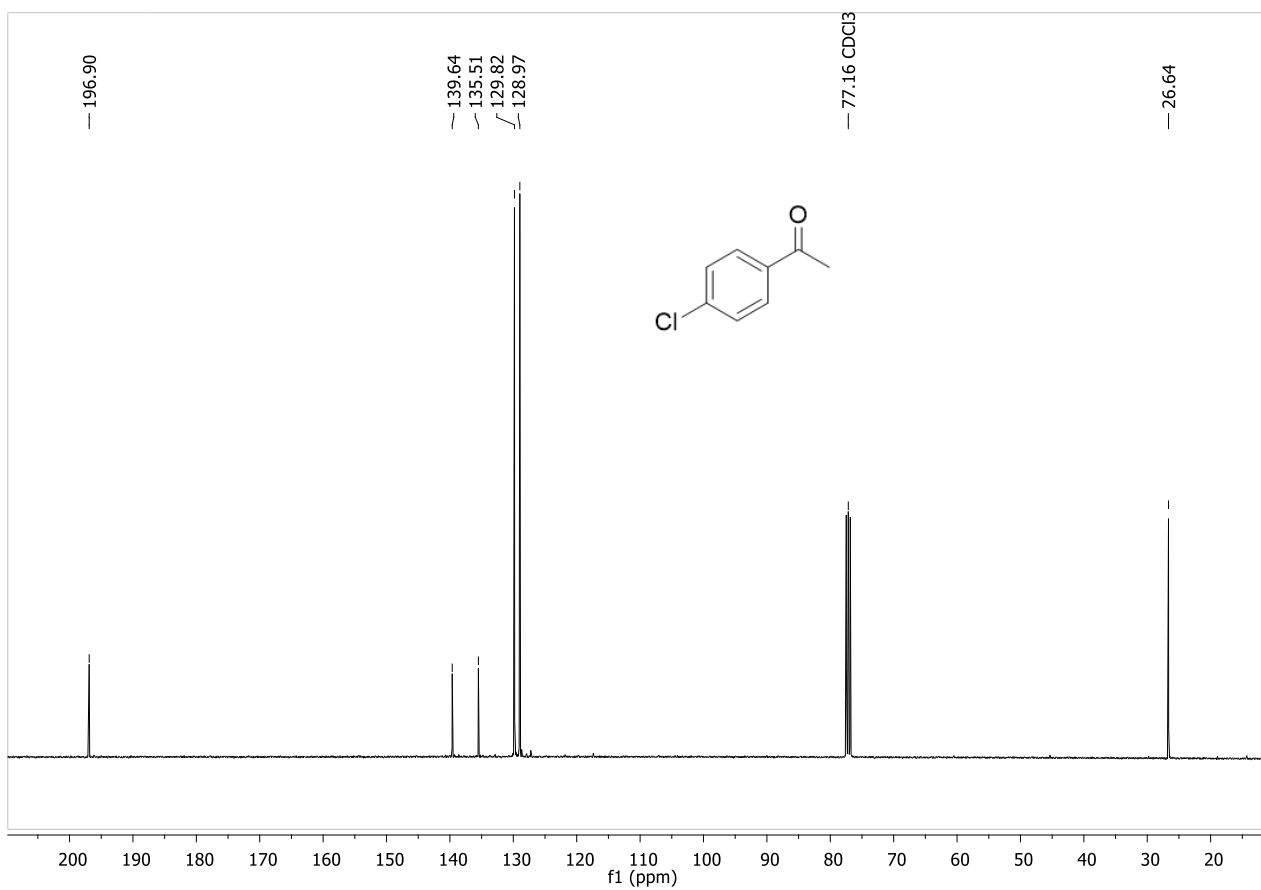

# 1-(4-Ethynylphenyl)ethan-1-one (2j)

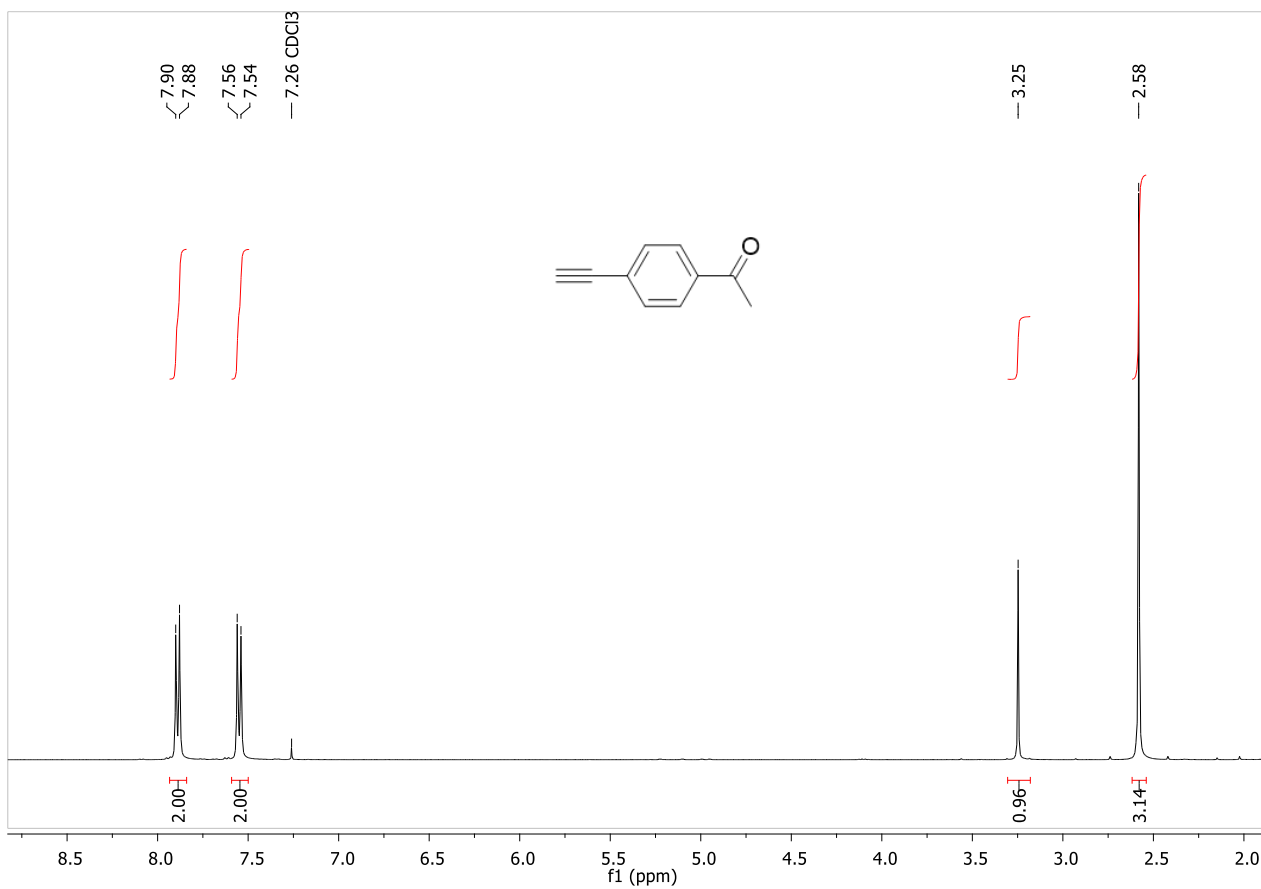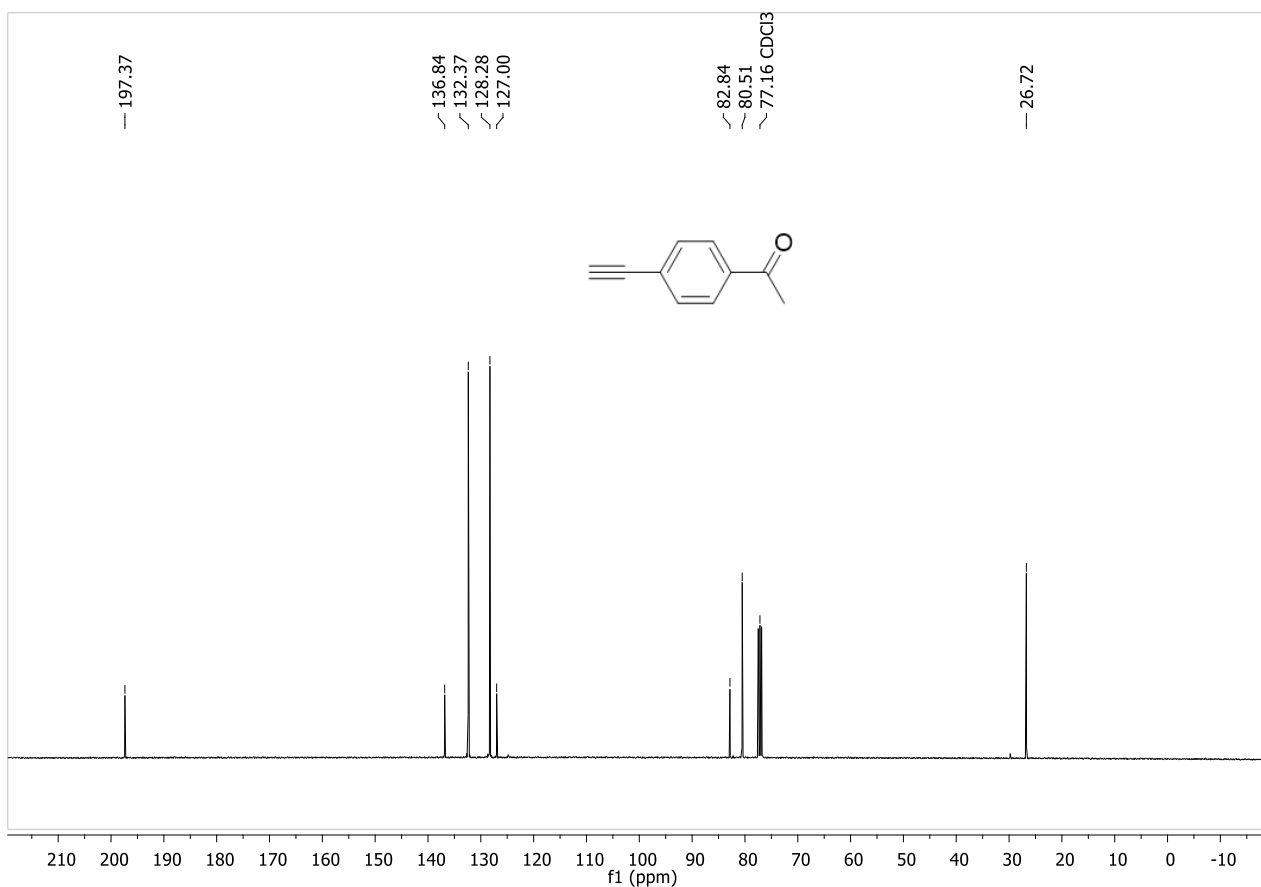

# 1,1'-(1,4-Phenylene)bis(ethan-1-one) (2jj)

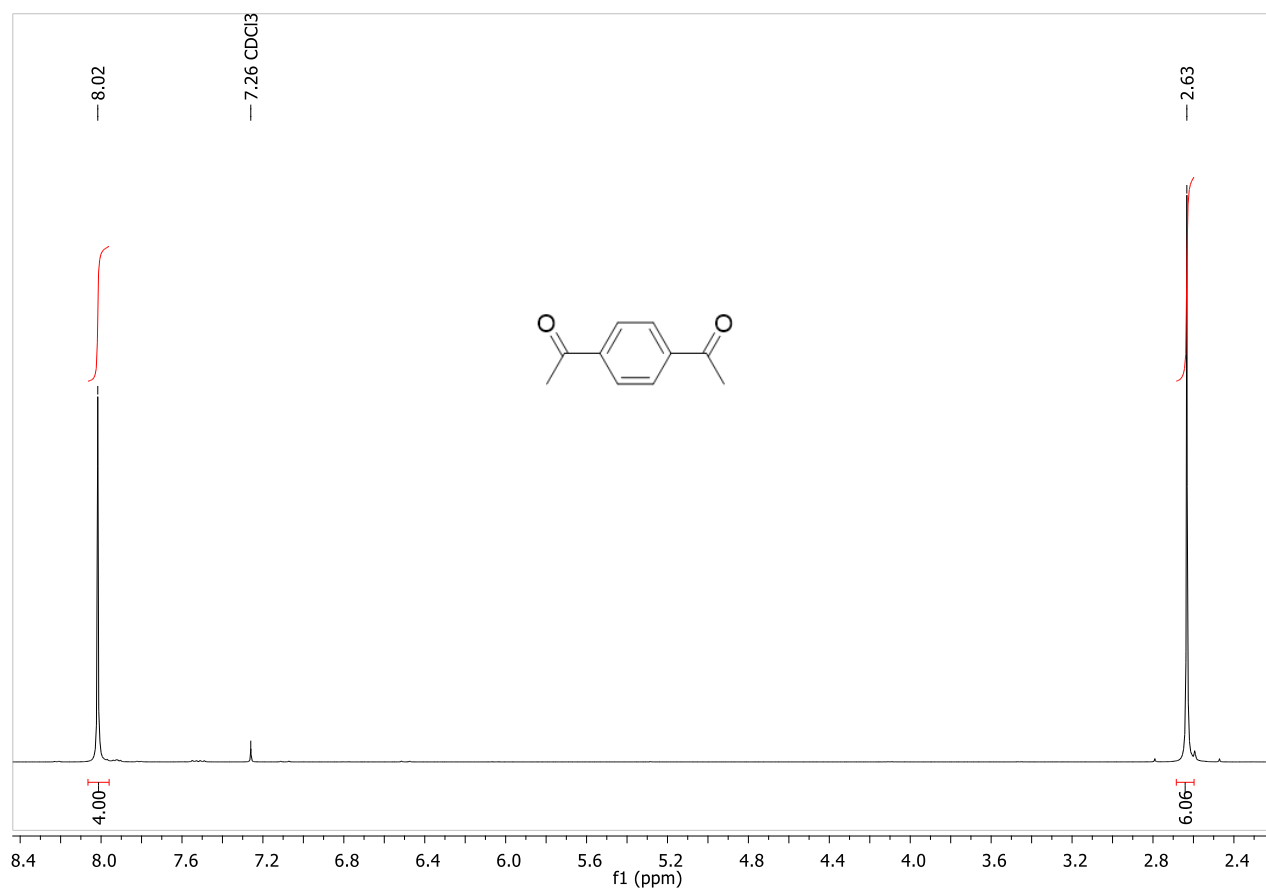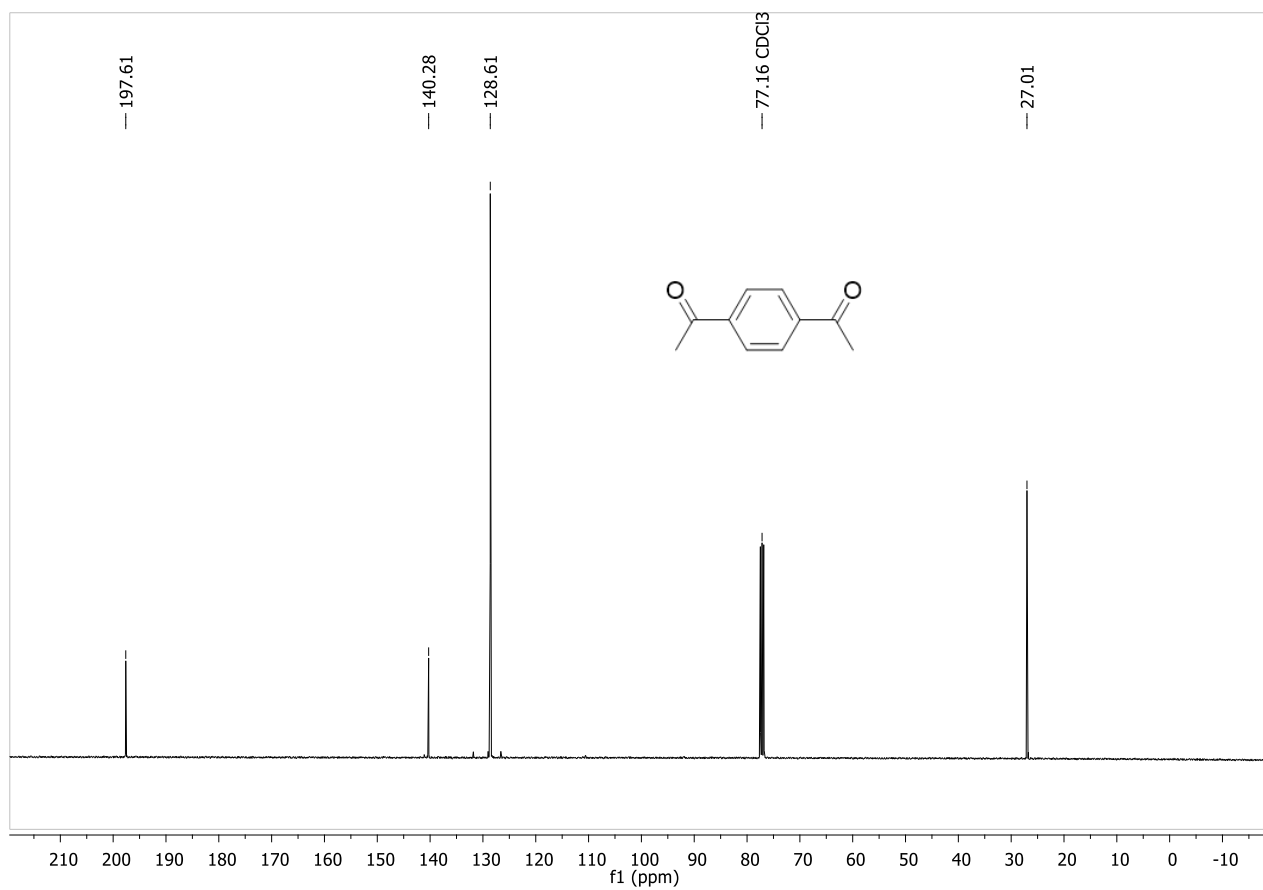

# 4-Phenylbutan-2-one (2k)

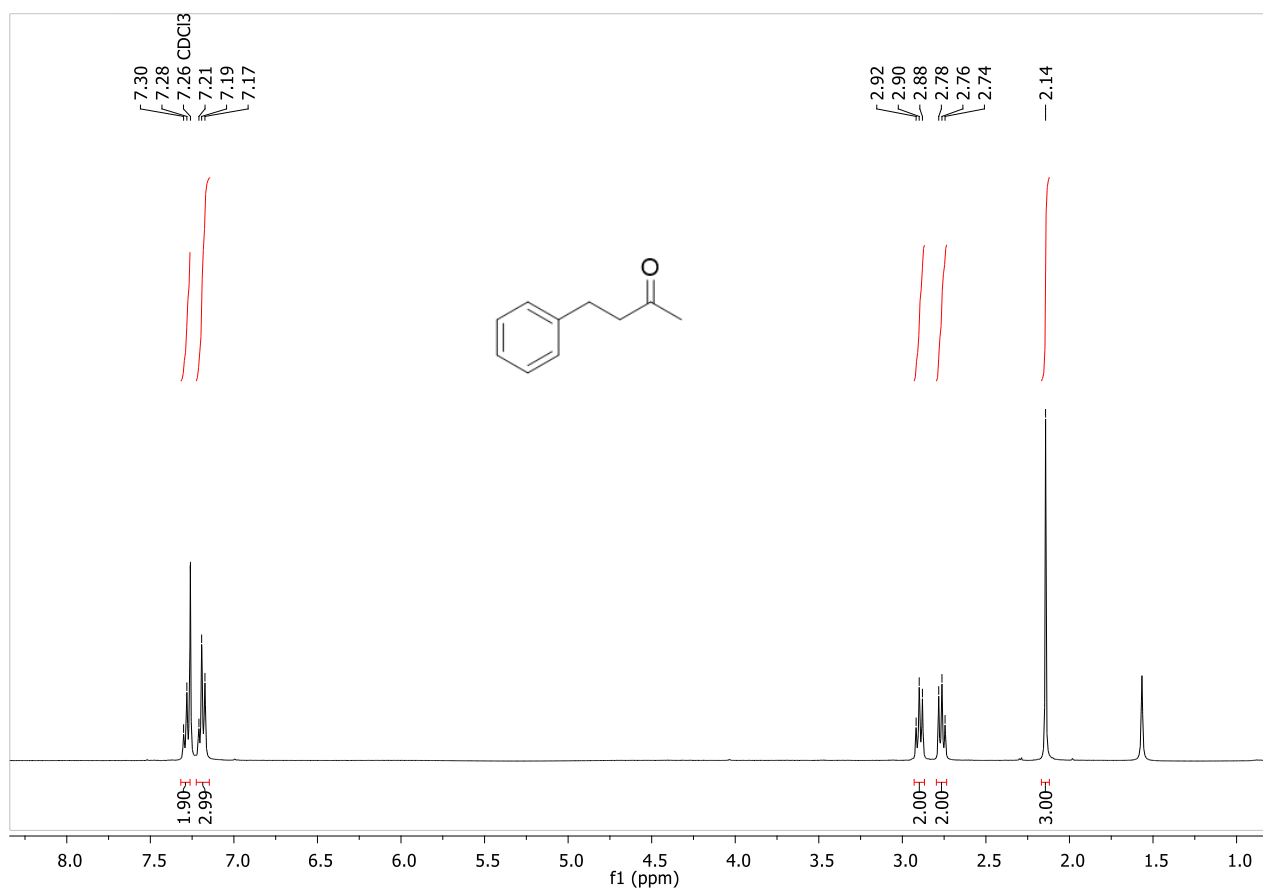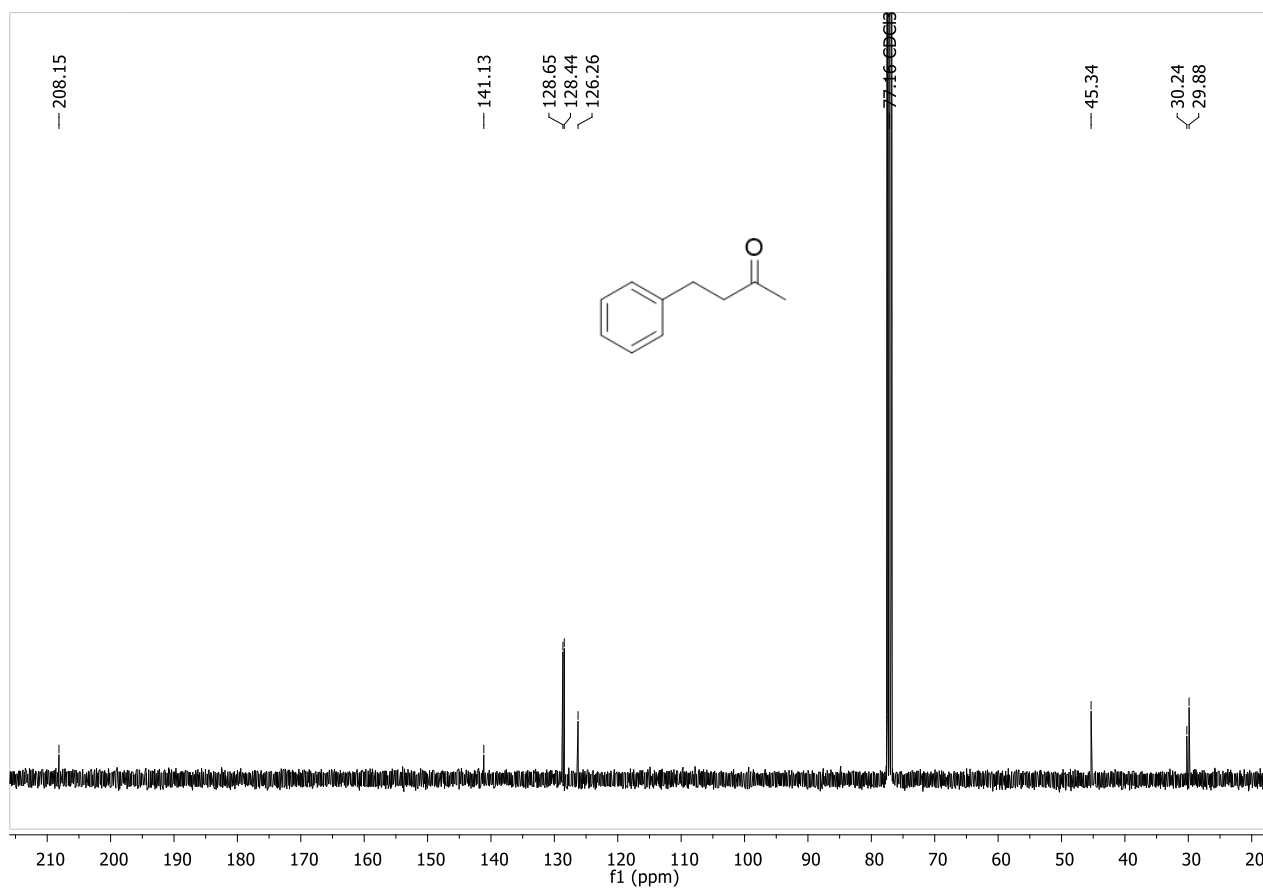

# 1-Phenylpropan-2-one (2l)

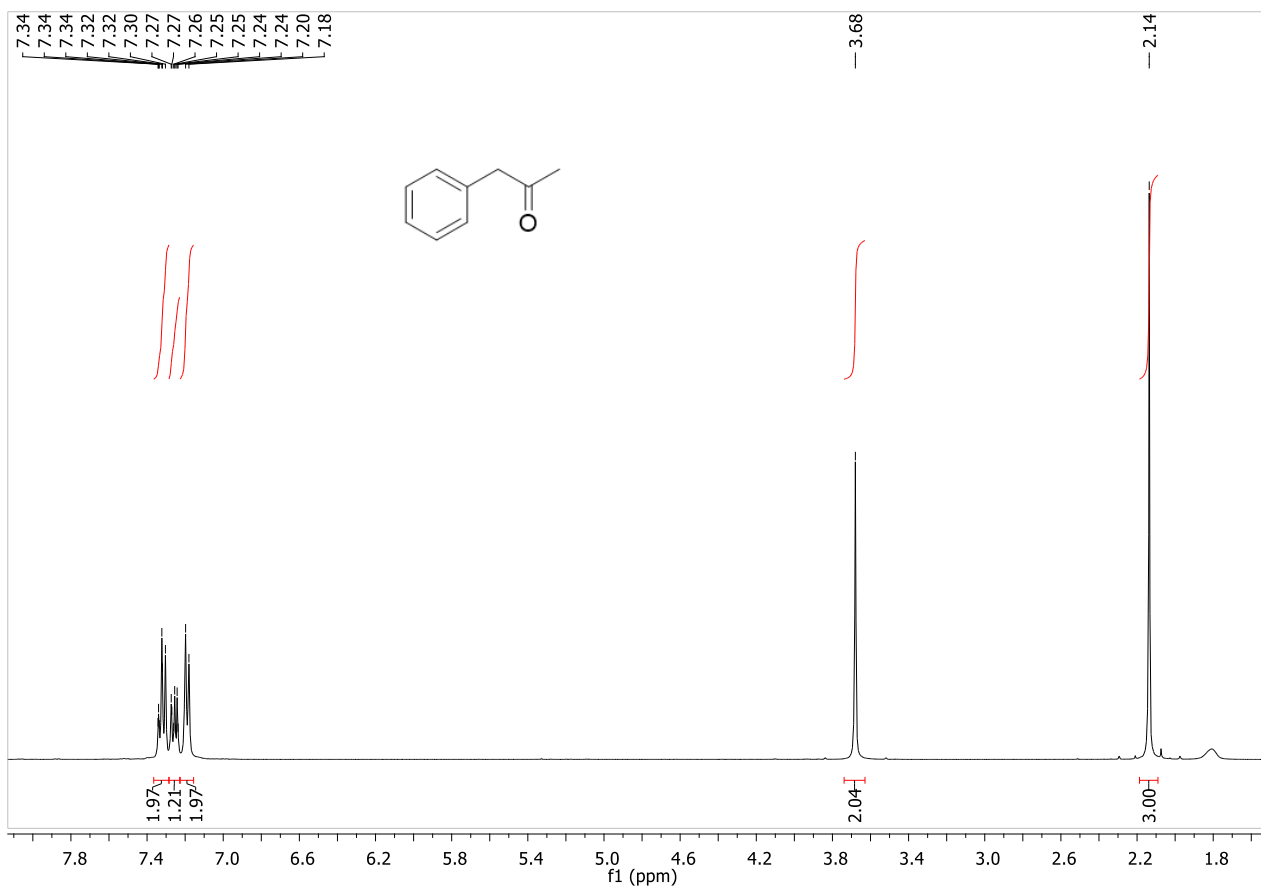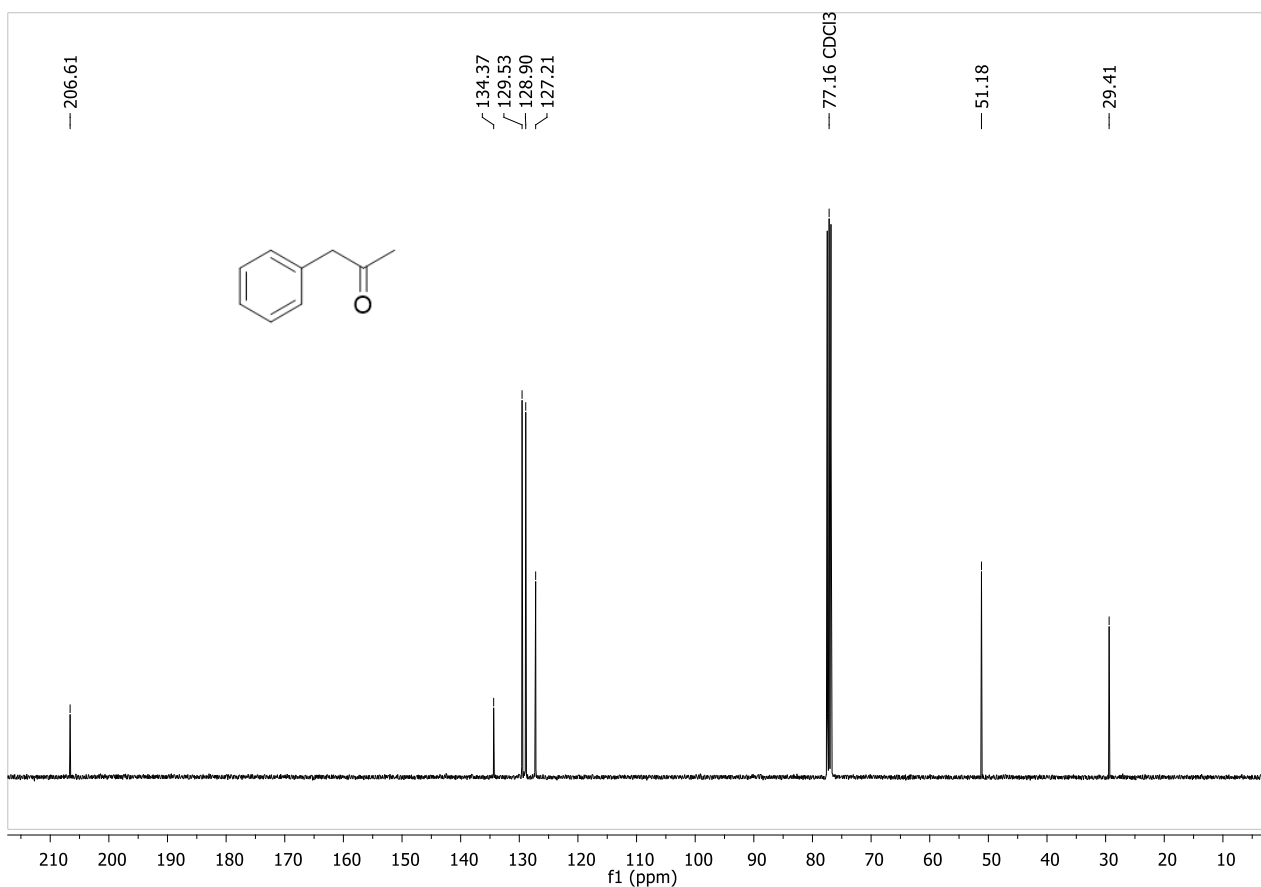



# Ethyl 3-oxo-3-phenylpropanoate (2m) (keto/enol)

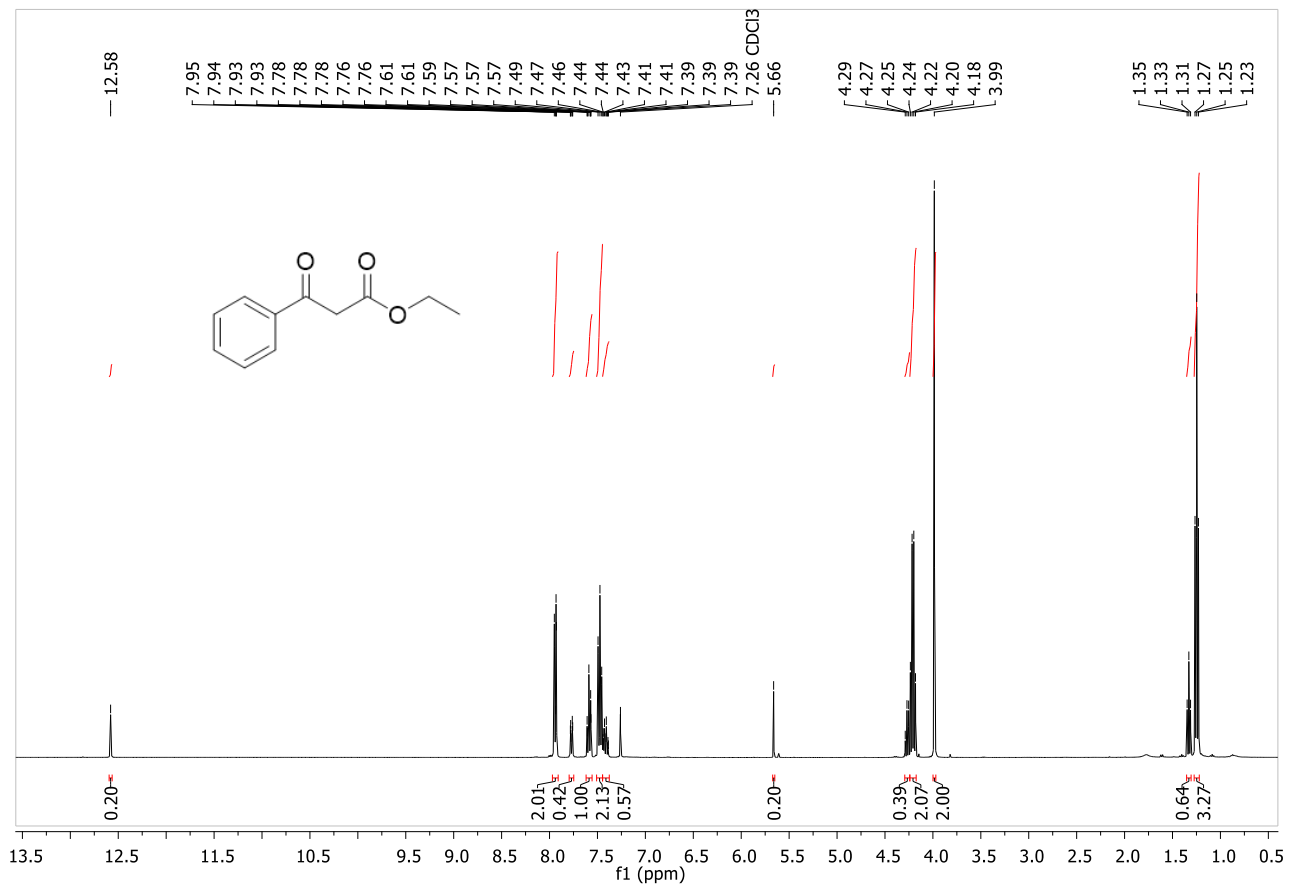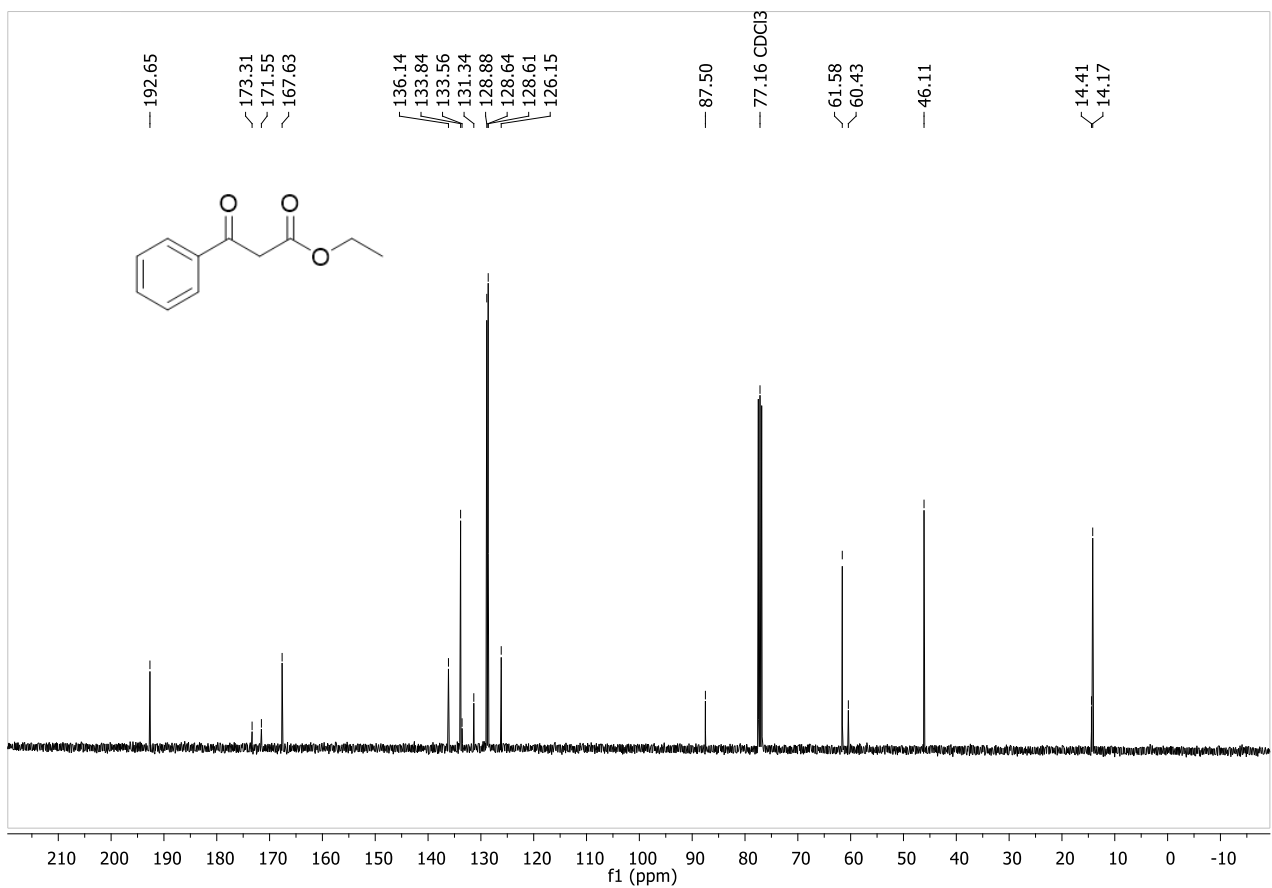

# Ethyl 3-(4-chlorophenyl)-3-oxopropanoate (2n) (keto/enol)

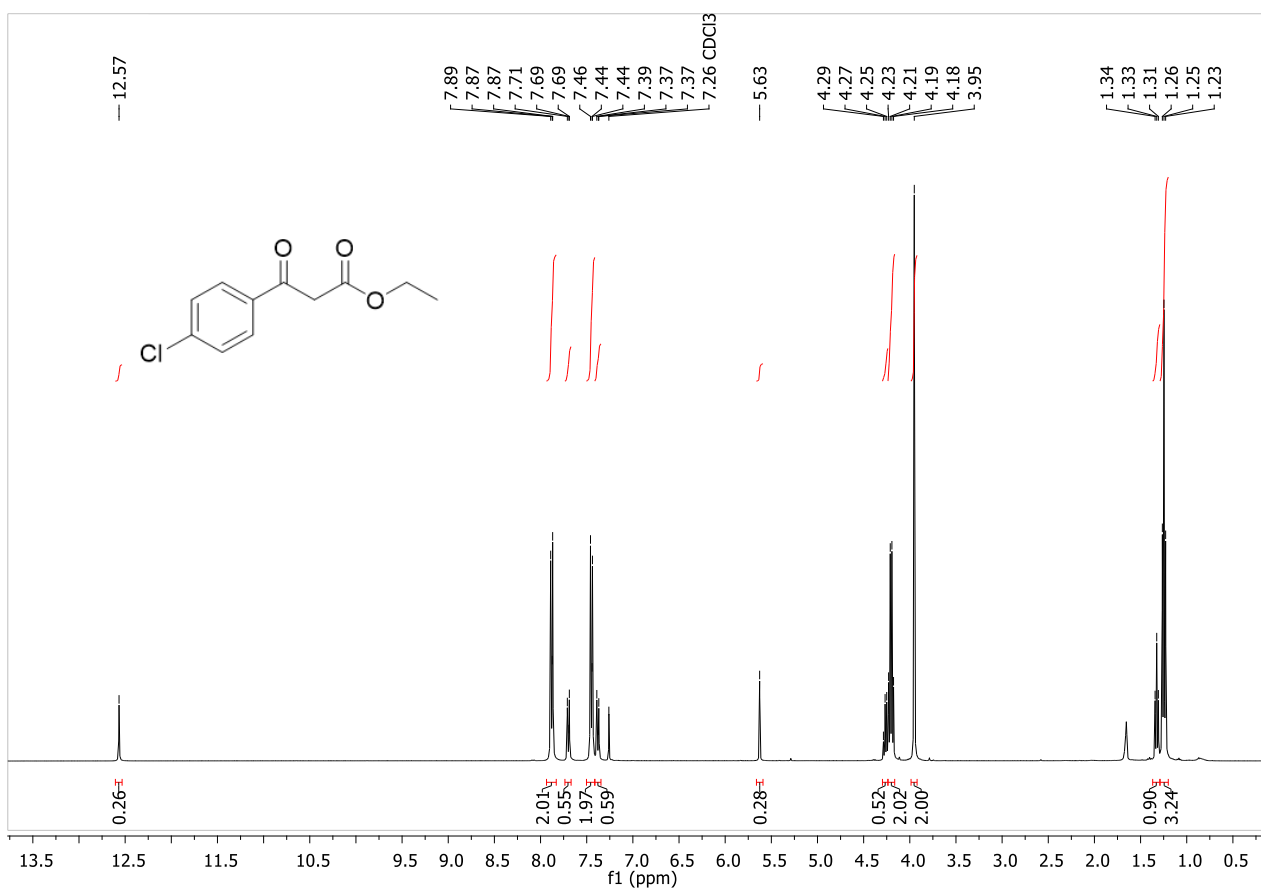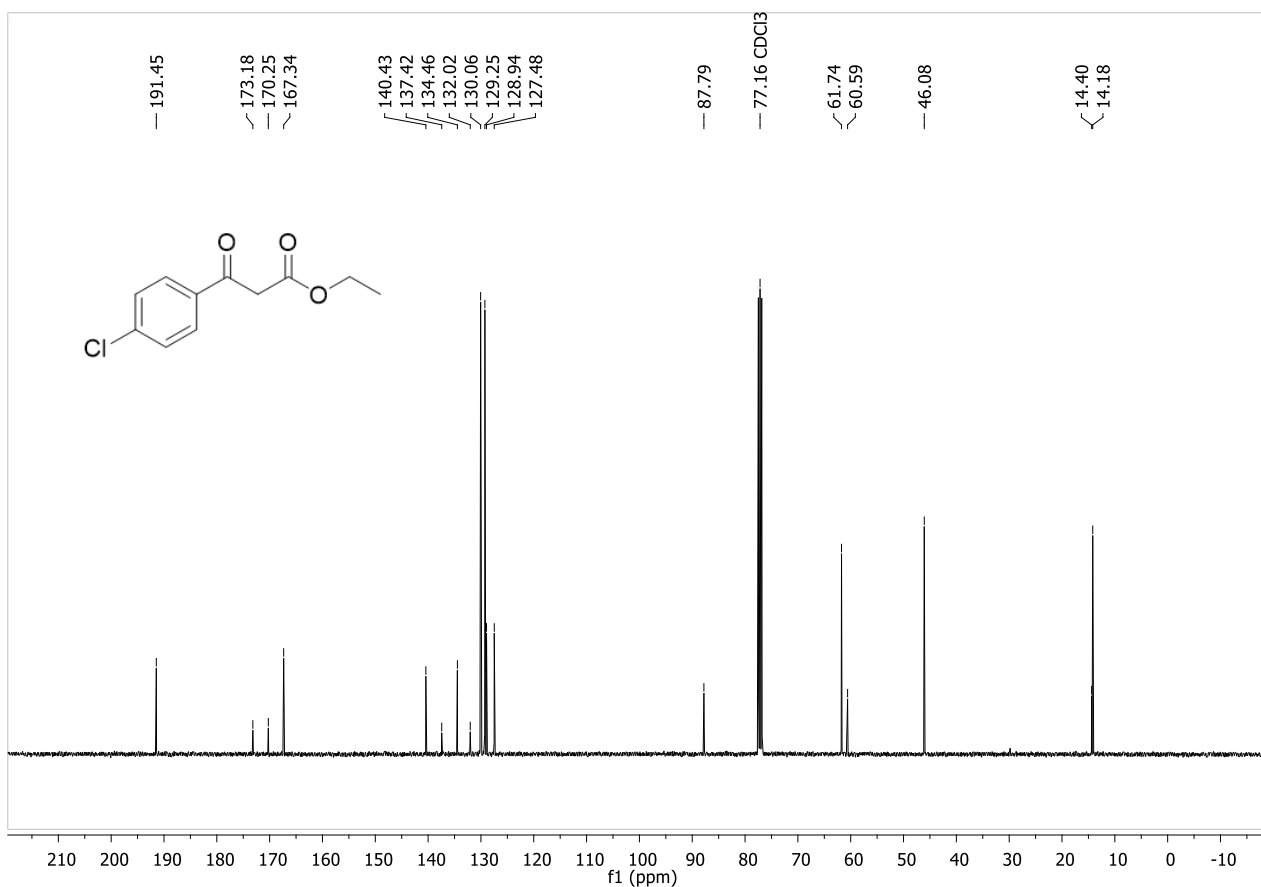

**(E)-1,3-Diphenylbut-2-en-1-one (3d)**

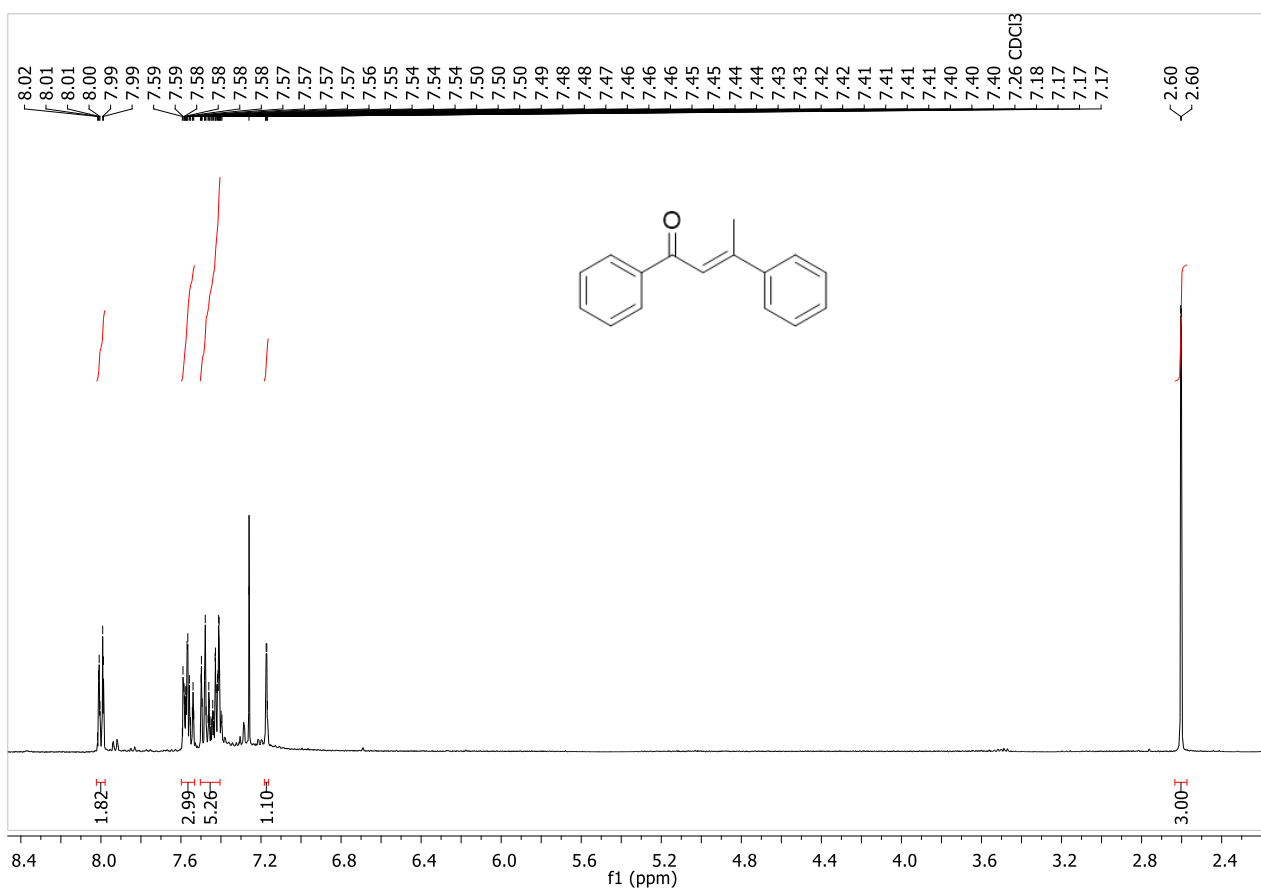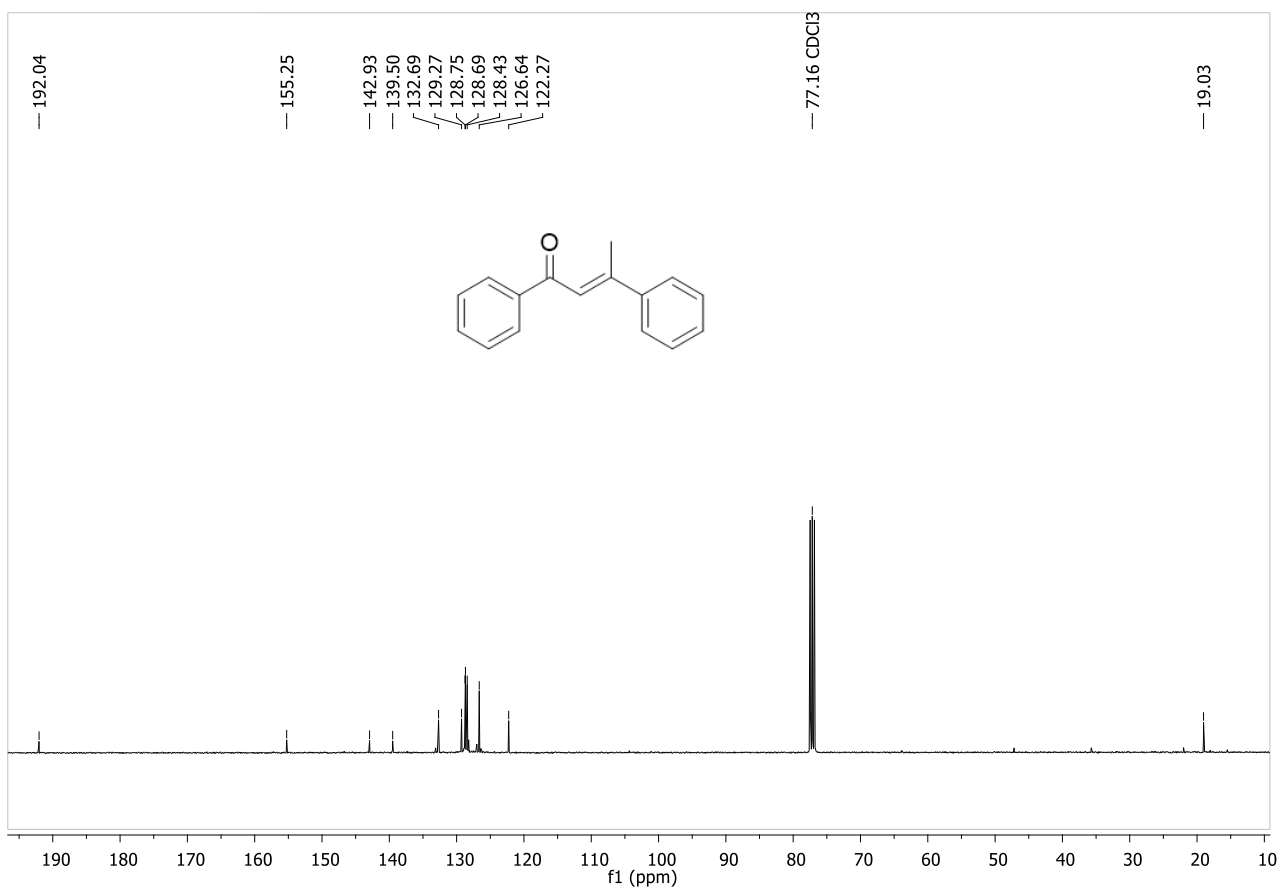

**(E)-1,3-Di-*p*-tolylbut-2-en-1-one (3e)**

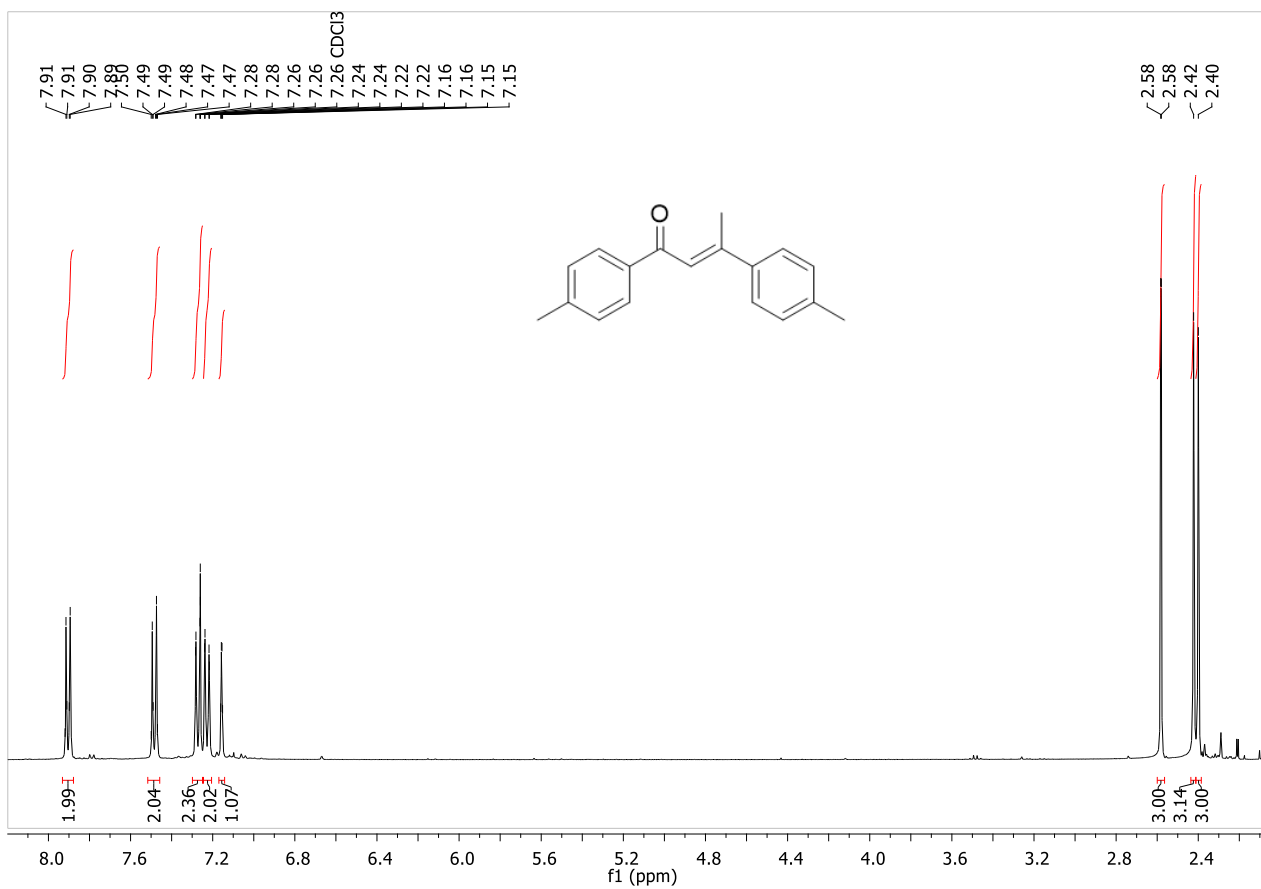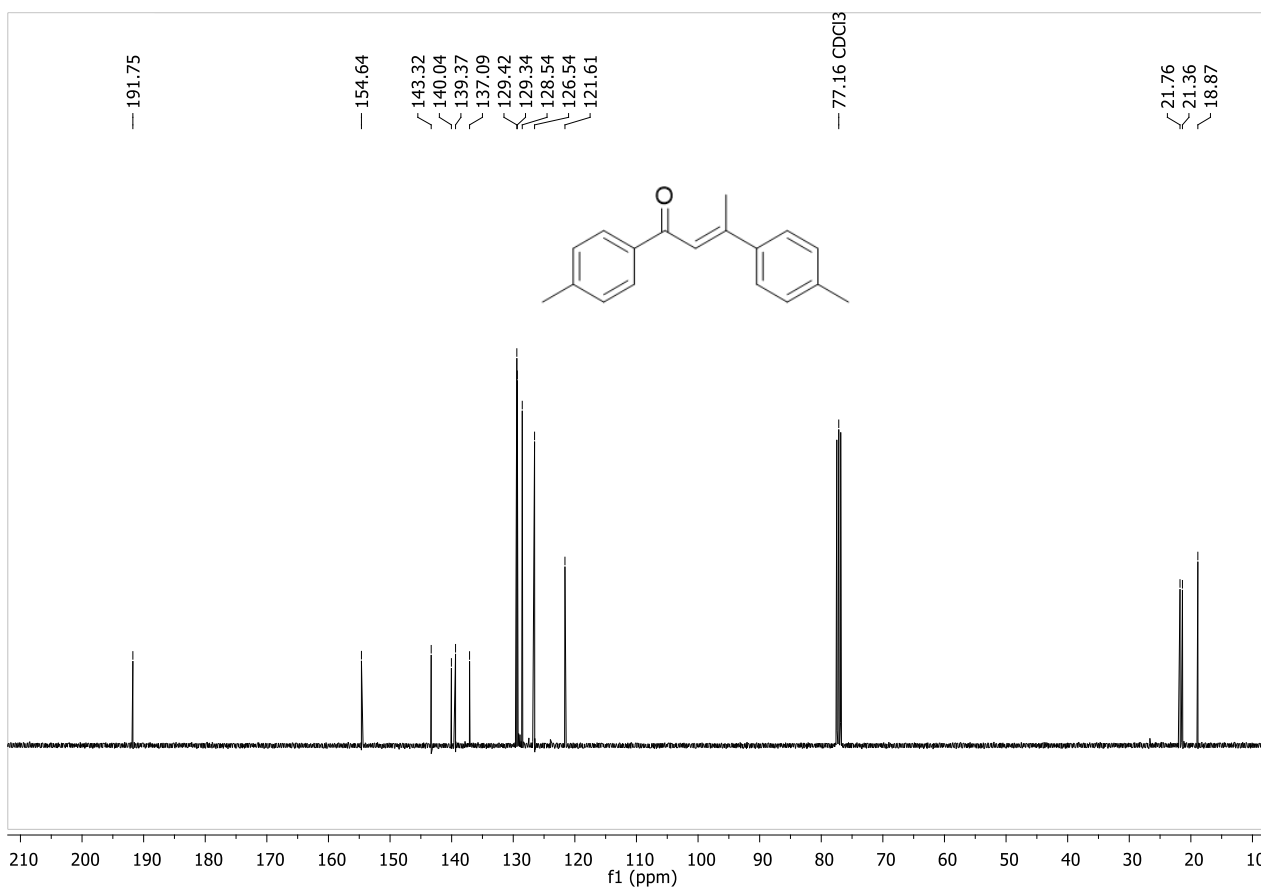

**(E)-1,3-Di-*m*-tolylbut-2-en-1-one (3f)**

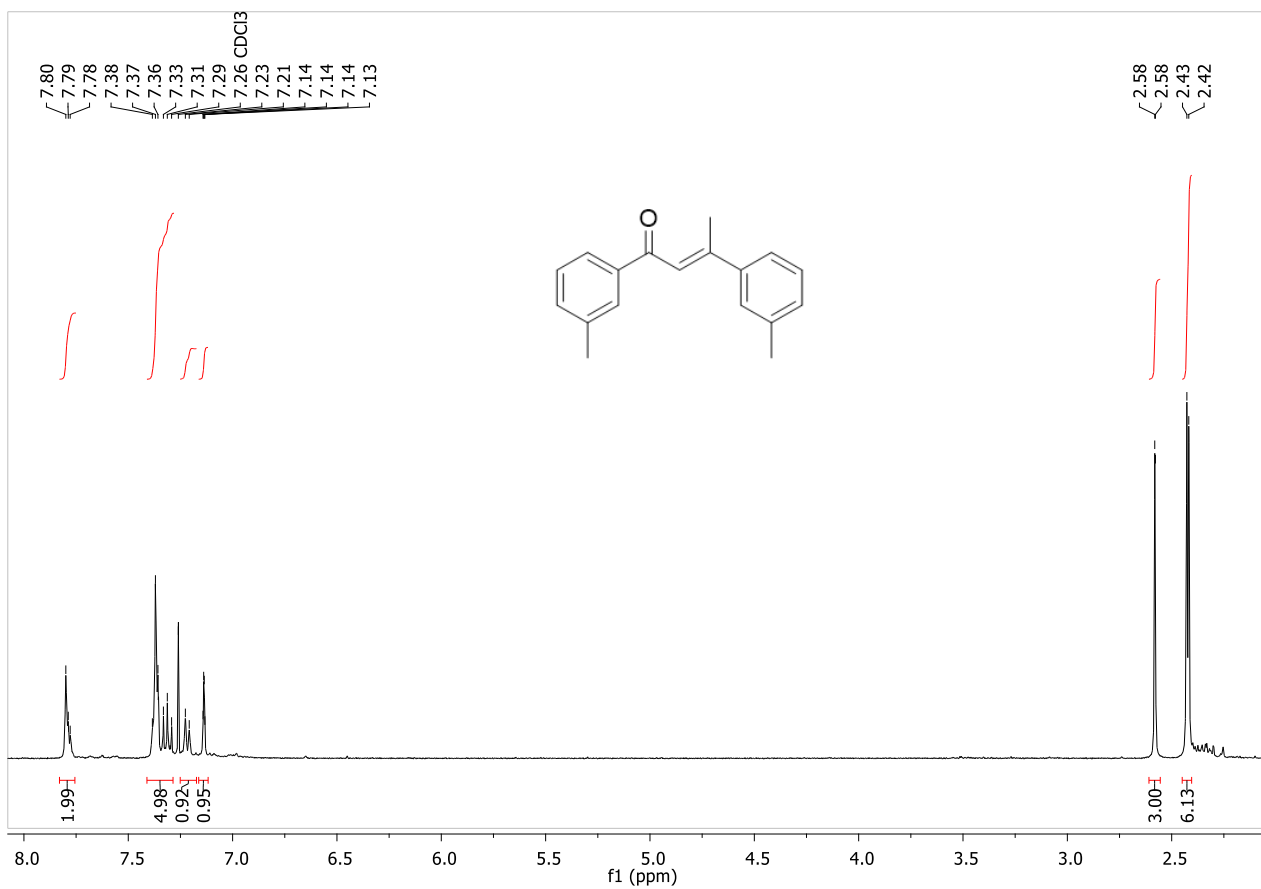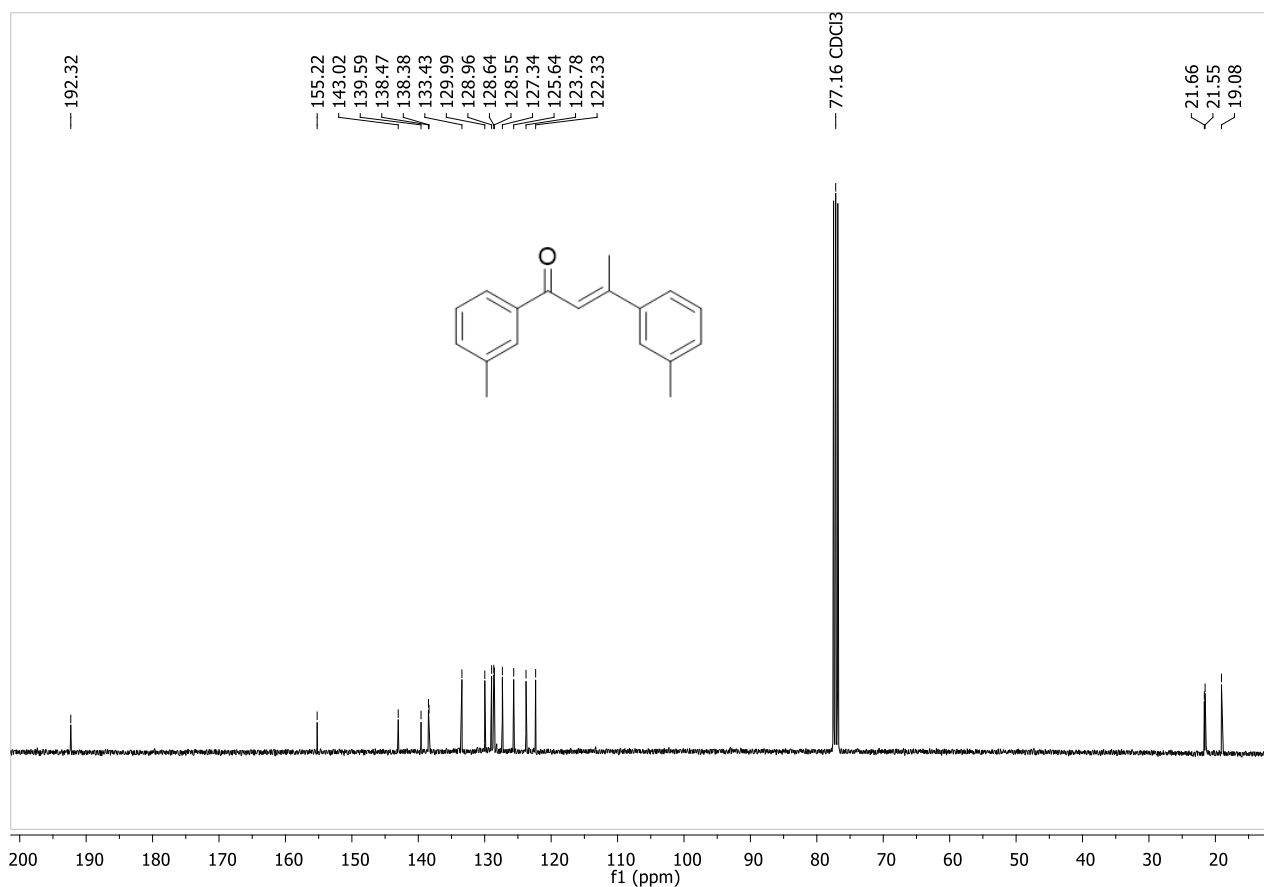

# 1,3-Di-*o*-tolylbut-2-en-1-one (E/Z mixture) (3g)

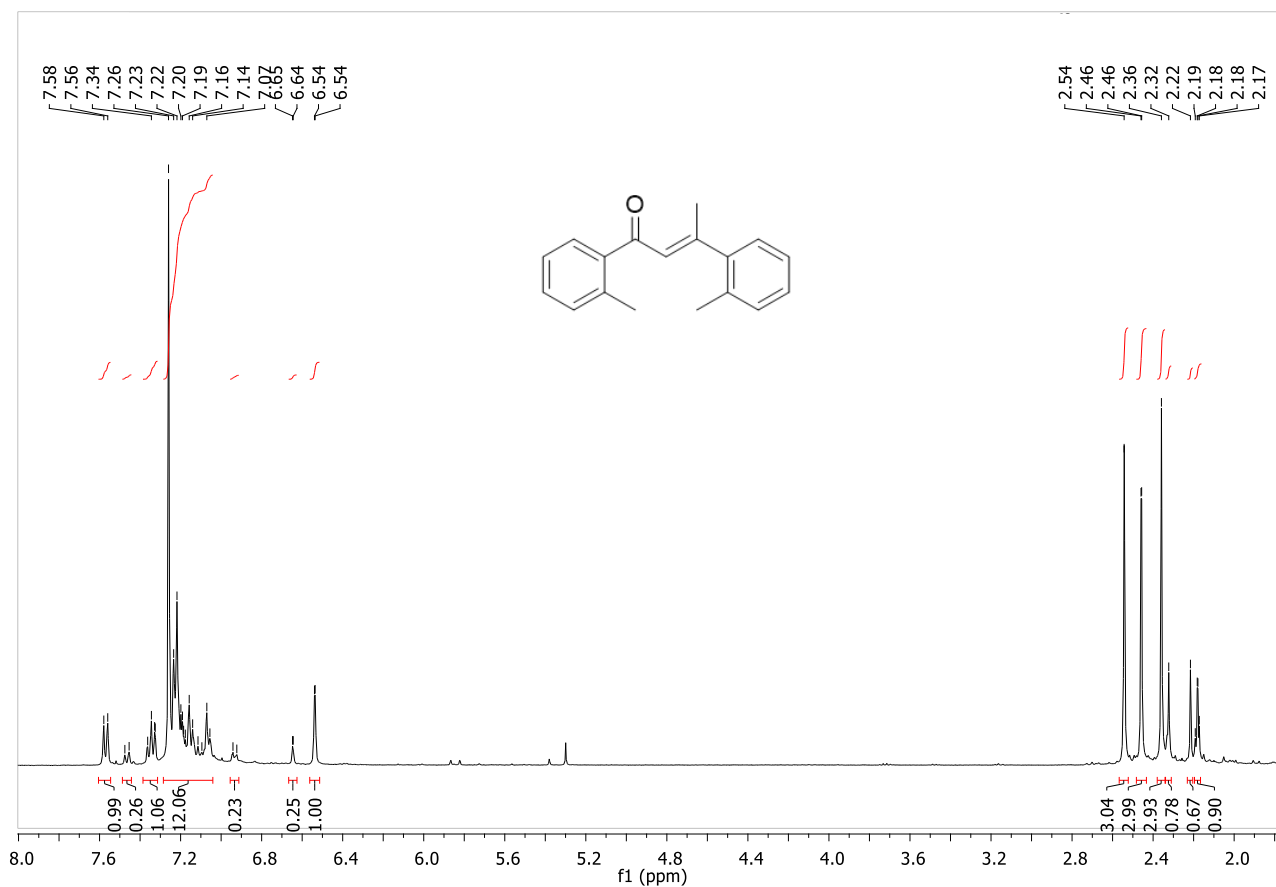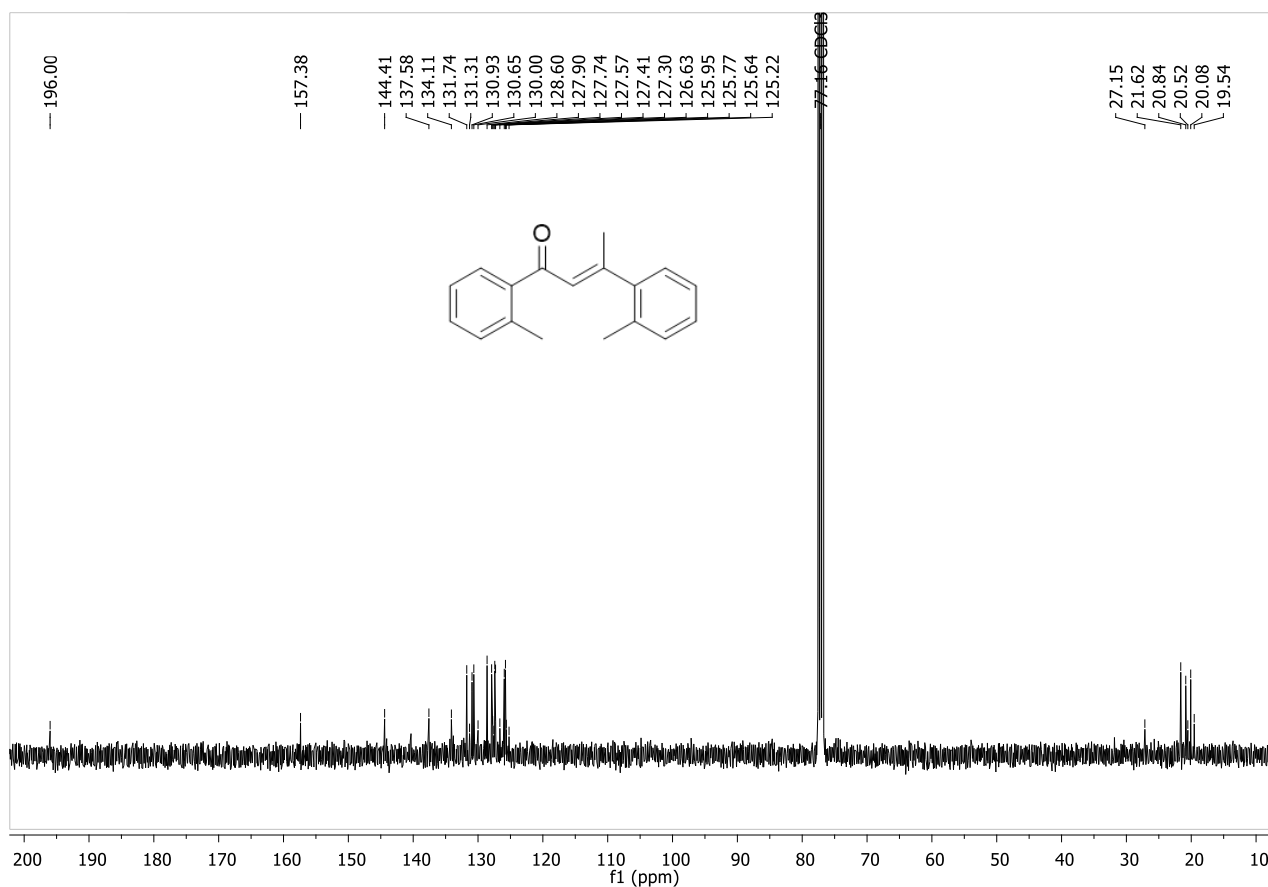

**(E)-1,3-Di([1,1'-biphenyl]-4-yl)but-2-en-1-one (3h)**

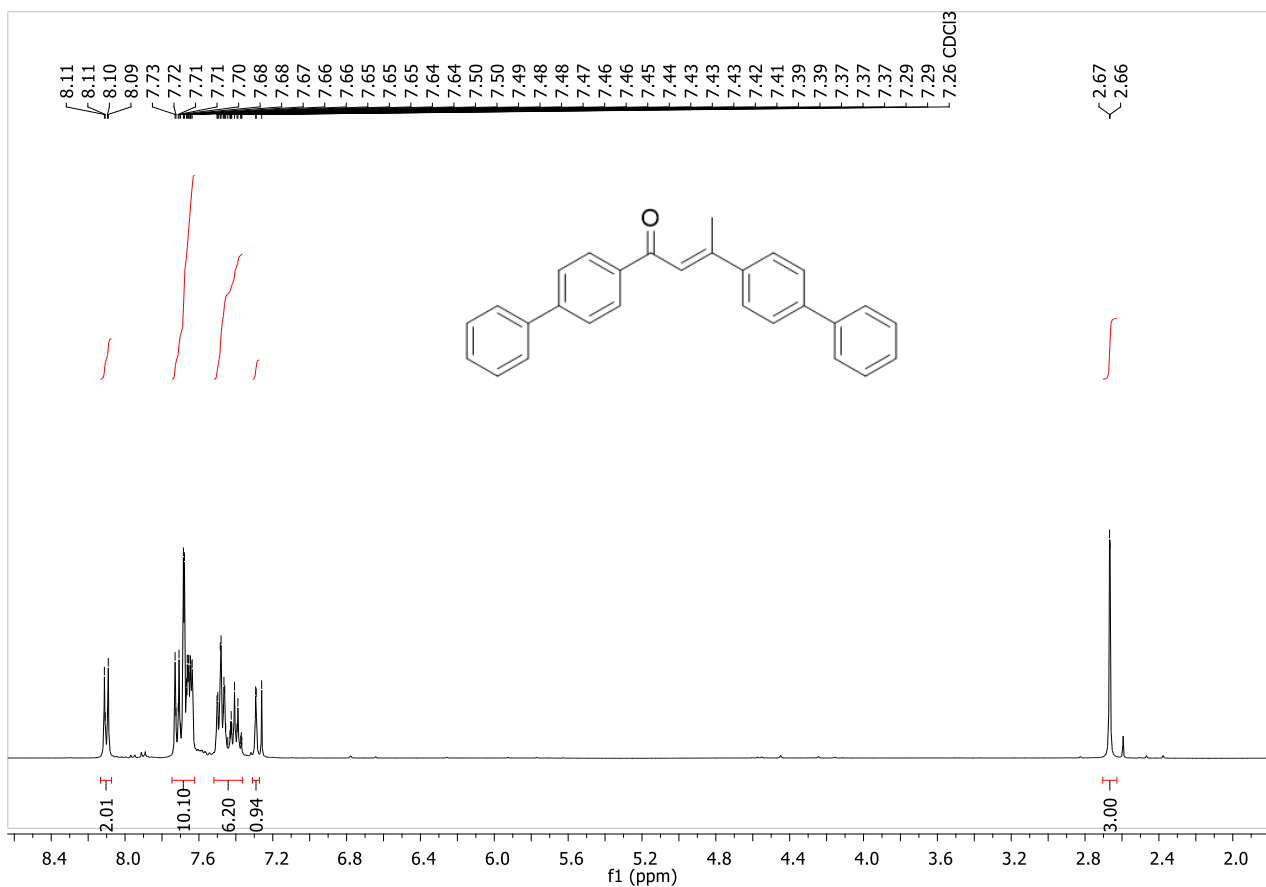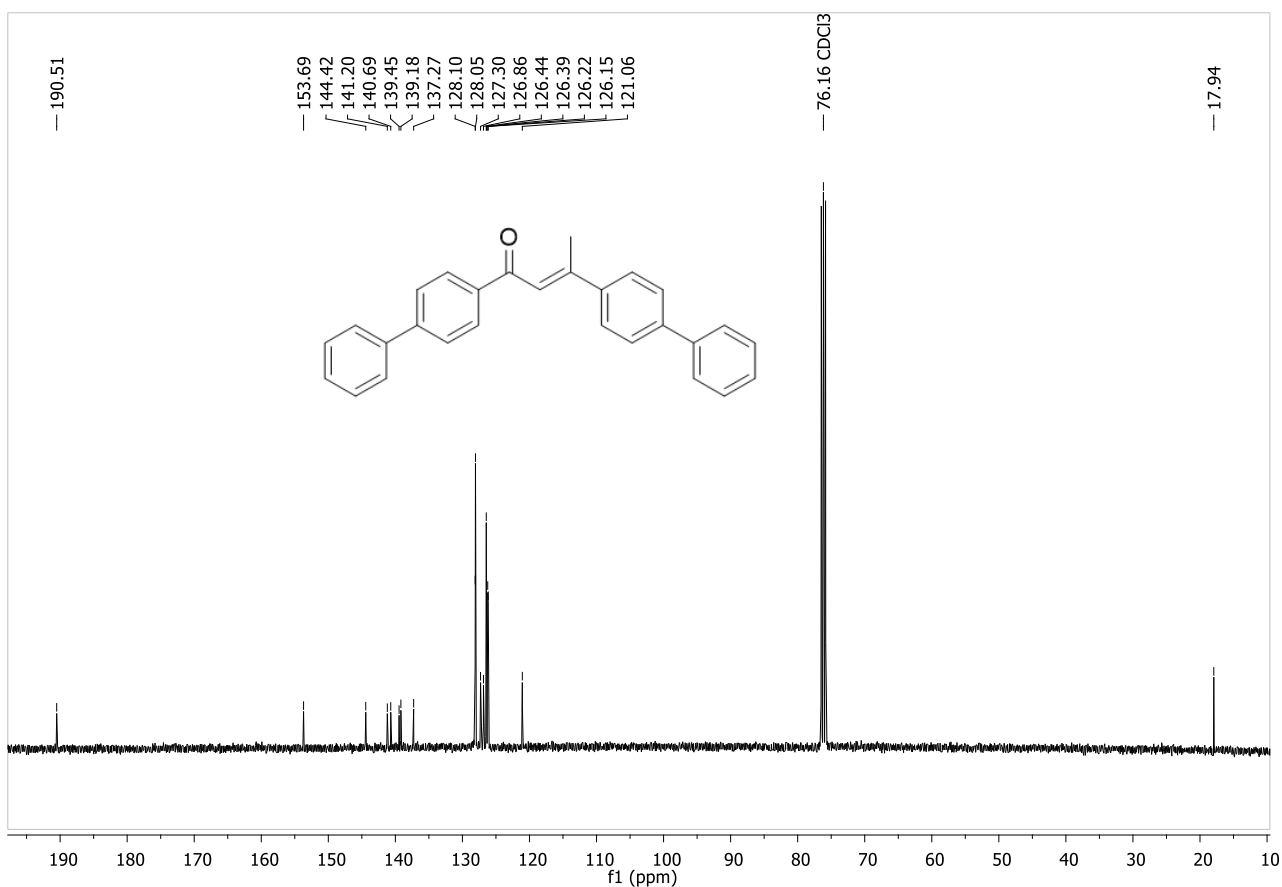

**(E)-1,3-Bis(4-chlorophenyl)but-2-en-1-one (3i)**

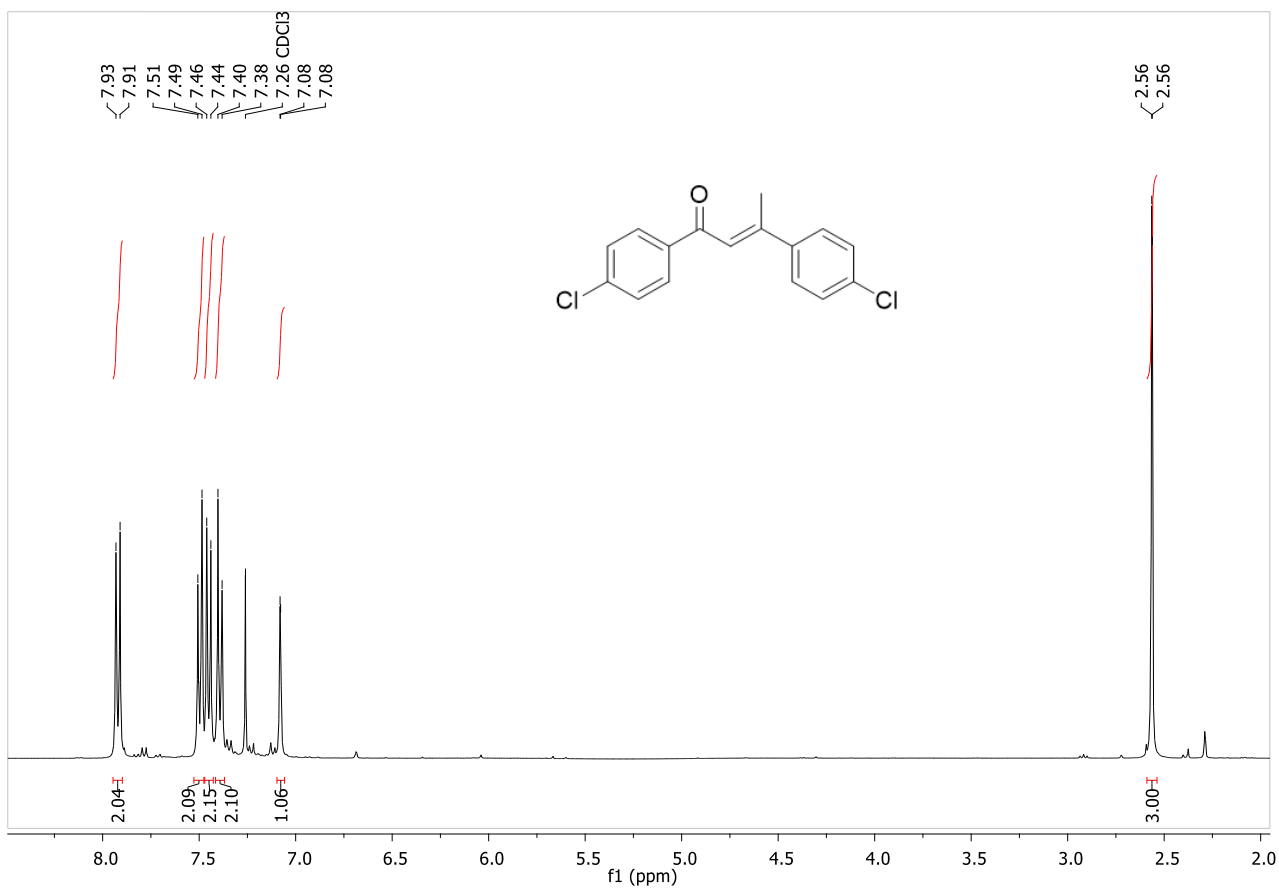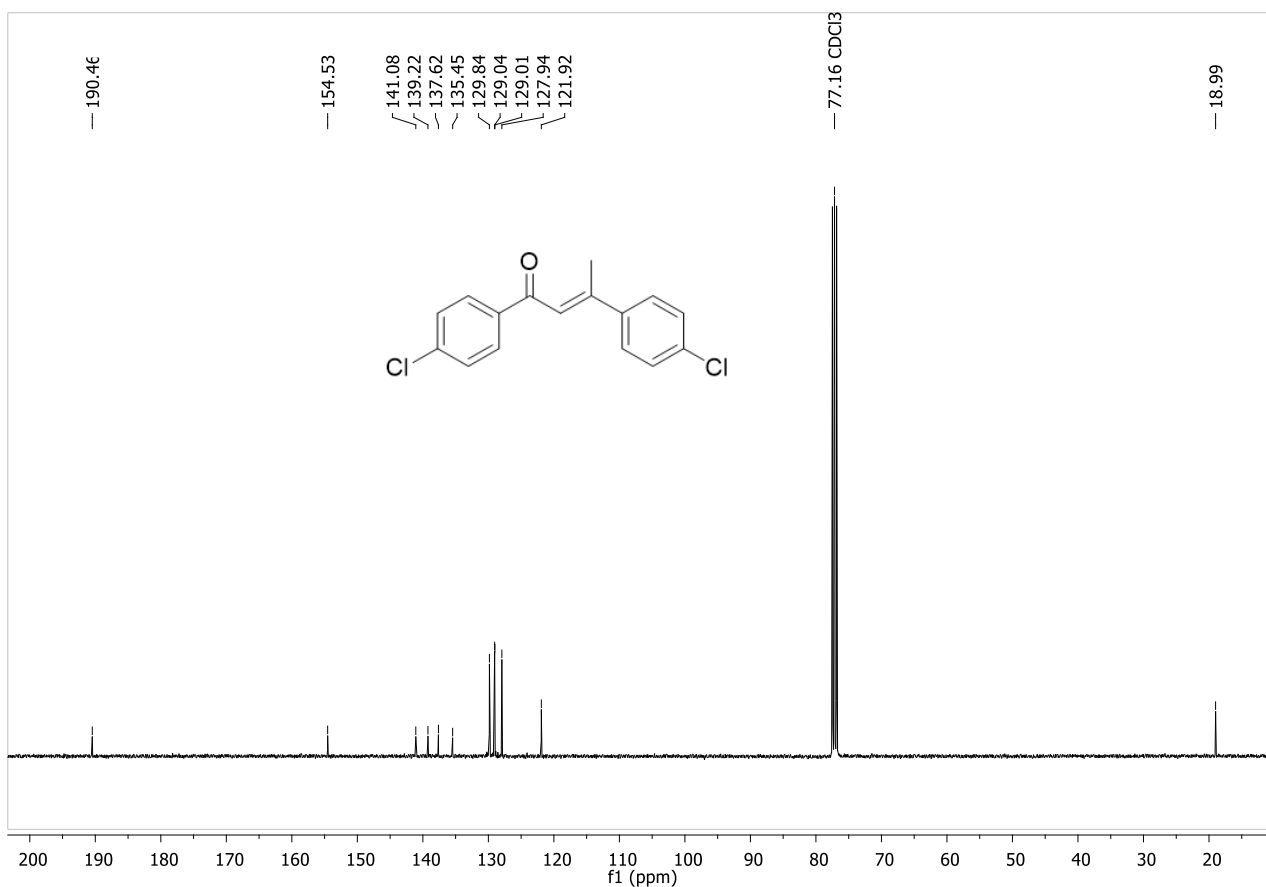



## References

- 1 M. Zheng, C. Huang, J.-Z. Yan, S.-L. Xie, S.-J. Ke, H.-D. Xia and Y.-N. Duan, In Situ Hypoiodite-Catalyzed Oxidative Rearrangement of Chalcones: Scope and Mechanistic Investigation, *J Org Chem*, 2023, **88**, 1504–1514.
- 2 A. L. Sandoval, K. E. Doherty, G. P. Wadey, C. M. Schroeder and N. E. Leadbeater, Fast, easy oxidation of alcohols using an oxoammonium salt bearing the nitrate anion, *Tetrahedron Lett*, 2023, **116**, 154332.
- 3 H. Wu, S. Chen, D. Xiao, F. Li, K. Zhou, X. Yin, C. Liu, X. He and Y. Shang, Visible-Light-Mediated Deacylated Alkynylation of Unstrained Ketone, *Org Lett*, 2023, **25**, 1166–1171.
- 4 S. Zhang, J. Zhang and H. Zou, Pd-Catalyzed TBHP-Mediated Selective Wacker-Type Oxidation and Oxo-acyloxylation of Olefins Using a 2-(1 *H*-Indazol-1-yl)quinoline Ligand, *Org Lett*, 2023, **25**, 1850–1855.
- 5 J. Huang, X. Yan and Y. Xia, Directing Group-Free Formal Suzuki–Miyaura Coupling of Simple Ketones Enabled by Activation of Unstrained C–C Bonds, *Angew Chem Int Ed Engl.*, 2022, **61**, e202211080.
- 6 A. Ikeda, M. Omote, K. Kusumoto, A. Tarui, K. Sato and A. Ando, One-pot synthesis of 1,3-enynes with a CF<sub>3</sub> group on the terminal sp<sup>2</sup> carbon by an oxidative Sonogashira cross-coupling reaction, *Org Biomol Chem*, 2015, **13**, 8886–8892.
- 7 J. Liu, K.-F. Hu, J.-P. Qu and Y.-B. Kang, Organopromoted Selectivity-Switchable Synthesis of Polyketones, *Org Lett*, 2017, **19**, 5593–5596.
- 8 A. K. Jha, R. Kumari and S. Easwar, Synthesis of 2,2-Disubstituted Dihydro-1,4-benzothiazines from Morita–Baylis–Hillman Ketones by an Oxidative Cyclization, *J Org Chem*, 2022, **87**, 5760–5772.
- 9 L. Saney, K. E. Christensen, X. Li, M. Genov, A. Pretsch, D. Pretsch and M. G. Moloney, Tetramate Derivatives by Chemoselective Dieckmann Ring Closure of *threo*-Phenylserines and Their Antibacterial Activity, *J Org Chem*, 2022, **87**, 12240–12249.
- 10 K. Deng, Q.-Y. Huai, Z.-L. Shen, H.-J. Li, C. Liu and Y.-C. Wu, Rearrangement of Dypnones to 1,3,5-Triarylbenzenes, *Org Lett*, 2015, **17**, 1473–1476.
- 11 B.-H. Xing, X.-X. Zhao, Y.-J. Qin, P. Zhang and Z.-X. Guo, Ferric chloride-catalyzed deoxygenative chlorination of carbonyl compounds: A comparison of chlorodimethylsilane and dichloromethylsilane system, *J Chem Res*, 2020, **44**, 667–675.
